# Supplementary material for: Vanillin Promotes the Germination of Antrodia camphorata Arthroconidia through PKA and MAPK Signaling Pathways
Source: Front Microbiol. 2017 Oct 23;8:2048. doi: 10.3389/fmicb.2017.02048 (PMC5660099; doi:10.3389/fmicb.2017.02048)
Supplement: Table S6 — Annotation of the proteins from iTRAQ with the KEGG database. [file Table6.XLSX]

## Sheet: 改动版-旧已全删-Table S7 Annotation of
Protein	Ko_id	Paths
ACg005181	K04043	path:ko03018;path:ko04212;path:ko05152
ACg003643	K03283	path:ko03040;path:ko04010;path:ko04141;path:ko04144;path:ko04213;path:ko04612;path:ko04915;path:ko05134;path:ko05145;path:ko05162;path:ko05164;path:ko05169
ACg008357	K03283	path:ko03040;path:ko04010;path:ko04141;path:ko04144;path:ko04213;path:ko04612;path:ko04915;path:ko05134;path:ko05145;path:ko05162;path:ko05164;path:ko05169
ACg006349	K01681	path:ko00020;path:ko00630;path:ko00720;path:ko01100;path:ko01110;path:ko01120;path:ko01130;path:ko01200;path:ko01210;path:ko01230
ACg005546	K04077	path:ko03018;path:ko04212;path:ko04940;path:ko05134;path:ko05152
ACg007343	K13126	path:ko03013;path:ko03015;path:ko03018
ACg002697	K15040	path:ko04020;path:ko04022;path:ko05012;path:ko05016;path:ko05166
ACg003161	K01689	path:ko00010;path:ko00680;path:ko01100;path:ko01110;path:ko01120;path:ko01130;path:ko01200;path:ko01230;path:ko03018;path:ko04066
ACg006465	K00026	path:ko00020;path:ko00270;path:ko00620;path:ko00630;path:ko00710;path:ko01100;path:ko01110;path:ko01120;path:ko01130;path:ko01200
ACg000107	K00026	path:ko00020;path:ko00270;path:ko00620;path:ko00630;path:ko00710;path:ko01100;path:ko01110;path:ko01120;path:ko01130;path:ko01200
ACg006477	K09490	path:ko03060;path:ko04141;path:ko04918;path:ko05020
ACg004557	K02132	path:ko00190;path:ko01100;path:ko05010;path:ko05012;path:ko05016
ACg003842	K02133	path:ko00190;path:ko01100;path:ko05010;path:ko05012;path:ko05016
ACg007746	K00927	path:ko00010;path:ko00710;path:ko01100;path:ko01110;path:ko01120;path:ko01130;path:ko01200;path:ko01230
ACg000382	K00549	path:ko00270;path:ko00450;path:ko01100;path:ko01110;path:ko01230
ACg005942	K03934	path:ko00190;path:ko01100;path:ko04932;path:ko05010;path:ko05012;path:ko05016
ACg000275	K09553	path:ko05020
ACg002682	K09291	path:ko03013;path:ko05200;path:ko05216
ACg003562	K00122	path:ko00630;path:ko00680;path:ko01100;path:ko01120;path:ko01200
ACg001718	K13201
ACg001613	K03231	path:ko03013;path:ko05134
ACg006440	K00134	path:ko00010;path:ko00710;path:ko01100;path:ko01110;path:ko01120;path:ko01130;path:ko01200;path:ko01230;path:ko04066;path:ko05010
ACg008771	K00382	path:ko00010;path:ko00020;path:ko00260;path:ko00280;path:ko00620;path:ko00630;path:ko00640;path:ko01100;path:ko01110;path:ko01120;path:ko01130;path:ko01200
ACg003092	K03234	path:ko04152;path:ko04921
ACg008146	K00428
ACg007480	K01027	path:ko00072;path:ko00280;path:ko00650
ACg002914	K00972	path:ko00520;path:ko01100;path:ko01130
ACg000101	K05692	path:ko04015;path:ko04145;path:ko04210;path:ko04390;path:ko04391;path:ko04510;path:ko04520;path:ko04530;path:ko04611;path:ko04670;path:ko04745;path:ko04810;path:ko04919;path:ko04921;path:ko05100;path:ko05110;path:ko05130;path:ko05131;path:ko05132;path:ko05164;path:ko05205;path:ko05410;path:ko05412;path:ko05414;path:ko05416
ACg004480	K00164	path:ko00020;path:ko00310;path:ko00380;path:ko01100;path:ko01110;path:ko01120;path:ko01130;path:ko01200
ACg001609	K13199
ACg004689	K03258	path:ko03013;path:ko04150;path:ko04151;path:ko05205
ACg001523	K17677
ACg000346	K00626	path:ko00071;path:ko00072;path:ko00280;path:ko00310;path:ko00362;path:ko00380;path:ko00620;path:ko00630;path:ko00640;path:ko00650;path:ko00720;path:ko00900;path:ko01100;path:ko01110;path:ko01120;path:ko01130;path:ko01200;path:ko01212;path:ko02020
ACg003011	K12852	path:ko03040
ACg003968	K00161	path:ko00010;path:ko00020;path:ko00620;path:ko01100;path:ko01110;path:ko01120;path:ko01130;path:ko01200;path:ko04066;path:ko04922;path:ko05230
ACg001164	K00234	path:ko00020;path:ko00190;path:ko01100;path:ko01110;path:ko01120;path:ko01130;path:ko01200;path:ko04932;path:ko05010;path:ko05012;path:ko05016
ACg008952	K03781	path:ko00380;path:ko00630;path:ko01110;path:ko01130;path:ko01200;path:ko04011;path:ko04068;path:ko04146;path:ko04211;path:ko04212;path:ko04213;path:ko05014
ACg006010	K04564	path:ko04068;path:ko04146;path:ko04211;path:ko04212;path:ko04213;path:ko05016
ACg001695	K01679	path:ko00020;path:ko00620;path:ko00720;path:ko01100;path:ko01110;path:ko01120;path:ko01130;path:ko01200;path:ko05200;path:ko05211
ACg008881	K18369	path:ko00640
ACg008158	K18097	path:ko00561;path:ko01100
ACg008558	K00326	path:ko00520
ACg004993	K13886
ACg003075	K13993	path:ko04141
ACg005888	K05864
ACg005298	K00128	path:ko00010;path:ko00040;path:ko00053;path:ko00071;path:ko00280;path:ko00310;path:ko00330;path:ko00340;path:ko00380;path:ko00410;path:ko00561;path:ko00620;path:ko00625;path:ko00903;path:ko01100;path:ko01110;path:ko01120;path:ko01130
ACg007069	K04564	path:ko04068;path:ko04146;path:ko04211;path:ko04212;path:ko04213;path:ko05016
ACg001434	K02358
ACg005313	K11836
ACg006198	K06630	path:ko04011;path:ko04110;path:ko04114;path:ko04151;path:ko04390;path:ko04391;path:ko04722;path:ko05169;path:ko05203
ACg007700	K12472	path:ko04144
ACg003110	K00027	path:ko00620;path:ko01200;path:ko02020
ACg006334	K08738	path:ko00920;path:ko01100;path:ko01120;path:ko02020;path:ko04115;path:ko04210;path:ko04932;path:ko05010;path:ko05012;path:ko05014;path:ko05016;path:ko05134;path:ko05145;path:ko05152;path:ko05161;path:ko05164;path:ko05168;path:ko05200;path:ko05210;path:ko05222;path:ko05416
ACg006383	K09104
ACg007038	K00616	path:ko00030;path:ko01100;path:ko01110;path:ko01120;path:ko01130;path:ko01200;path:ko01230
ACg008919	K00415	path:ko00190;path:ko01100;path:ko04260;path:ko04932;path:ko05010;path:ko05012;path:ko05016
ACg002576	K15437
ACg006690	K00602	path:ko00230;path:ko00670;path:ko01100;path:ko01110;path:ko01130
ACg000860	K00600	path:ko00260;path:ko00460;path:ko00630;path:ko00670;path:ko00680;path:ko01100;path:ko01110;path:ko01120;path:ko01130;path:ko01200;path:ko01230
ACg000376	K02934	path:ko03010
ACg007473	K00264	path:ko00250;path:ko00910;path:ko01100;path:ko01110;path:ko01120;path:ko01130;path:ko01230
ACg008192	K12881	path:ko03013;path:ko03015;path:ko03040;path:ko05168
ACg008337	K01858	path:ko00521;path:ko00562;path:ko01100;path:ko01130
ACg000296	K01702	path:ko00290;path:ko01100;path:ko01110;path:ko01210;path:ko01230
ACg005878	K02136	path:ko00190;path:ko01100;path:ko05010;path:ko05012;path:ko05016
ACg007192	K07375	path:ko04145;path:ko04540;path:ko05130
ACg008687	K00413	path:ko00190;path:ko01100;path:ko02020;path:ko04260;path:ko04932;path:ko05010;path:ko05012;path:ko05016
ACg007429	K05275	path:ko00750;path:ko01100;path:ko01120
ACg007736	K09503	path:ko04141
ACg001187	K00939	path:ko00230;path:ko01100;path:ko01110;path:ko01130
ACg006163	K00030	path:ko00020;path:ko01100;path:ko01110;path:ko01120;path:ko01130;path:ko01200;path:ko01210;path:ko01230
ACg007077	K00354
ACg009081	K07119
ACg003846	K13162
ACg007104	K02936	path:ko03010
ACg007812	K02962	path:ko03010
ACg004272	K02134	path:ko00190;path:ko01100;path:ko05010;path:ko05012;path:ko05016
ACg003618	K02137	path:ko00190;path:ko01100;path:ko05010;path:ko05012;path:ko05016
ACg001780	K03781	path:ko00380;path:ko00630;path:ko01110;path:ko01130;path:ko01200;path:ko04011;path:ko04068;path:ko04146;path:ko04211;path:ko04212;path:ko04213;path:ko05014
ACg005448	K00059	path:ko00061;path:ko00780;path:ko01040;path:ko01100;path:ko01212
ACg001003	K01802
ACg004697	K12823	path:ko03040;path:ko05202;path:ko05205
ACg007715	K02145	path:ko00190;path:ko01100;path:ko04145;path:ko04721;path:ko04966;path:ko05110;path:ko05120;path:ko05323
ACg006702	K11594	path:ko04622;path:ko05161;path:ko05203
ACg000883	K17818	path:ko00040;path:ko01100
ACg008432	K17974
ACg001306	K17743	path:ko00040;path:ko01100
ACg003803	K06063	path:ko03040;path:ko04330;path:ko05169;path:ko05203
ACg001122	K11275
ACg001837	K10599	path:ko03040;path:ko04120
ACg008657	K01958	path:ko00020;path:ko00620;path:ko00720;path:ko01100;path:ko01120;path:ko01200;path:ko01230
ACg005536	K14012	path:ko04141
ACg003055	K14849
ACg006078	K15306	path:ko05166;path:ko05203
ACg005215	K15428	path:ko00480;path:ko01100
ACg004682	K01647	path:ko00020;path:ko00630;path:ko01100;path:ko01110;path:ko01120;path:ko01130;path:ko01200;path:ko01210;path:ko01230
ACg002291	K00053	path:ko00290;path:ko00770;path:ko01100;path:ko01110;path:ko01130;path:ko01210;path:ko01230
ACg004132	K14684
ACg008702	K01648	path:ko00020;path:ko00720;path:ko01100;path:ko01110;path:ko01120;path:ko01130
ACg001805	K01900	path:ko00020;path:ko00640;path:ko01100;path:ko01110;path:ko01120;path:ko01130;path:ko01200
ACg001370	K16944
ACg002831	K00344
ACg000132	K00088	path:ko00230;path:ko00983;path:ko01100;path:ko01110
ACg003021	K01637	path:ko00630;path:ko01100;path:ko01110;path:ko01120;path:ko01200
ACg000253	K02138	path:ko00190;path:ko01100;path:ko05010;path:ko05012;path:ko05016
ACg008089	K03426	path:ko00760;path:ko01100;path:ko04146
ACg008611	K07513	path:ko00071;path:ko00280;path:ko00592;path:ko01040;path:ko01100;path:ko01110;path:ko01130;path:ko01212;path:ko03320;path:ko04146
ACg004607	K00863	path:ko00561;path:ko00680;path:ko01100;path:ko01120;path:ko01200;path:ko04622
ACg004737	K02943	path:ko03010
ACg003541	K02981	path:ko03010
ACg008380	K12825	path:ko03040
ACg006840	K01527
ACg002550	K00111	path:ko00564;path:ko01110
ACg006168	K01915	path:ko00220;path:ko00250;path:ko00630;path:ko00910;path:ko01100;path:ko01120;path:ko01230;path:ko02020;path:ko04724;path:ko04727
ACg004328	K01638	path:ko00620;path:ko00630;path:ko01100;path:ko01110;path:ko01120;path:ko01200
ACg001042	K17275
ACg006186	K00162	path:ko00010;path:ko00020;path:ko00620;path:ko01100;path:ko01110;path:ko01120;path:ko01130;path:ko01200;path:ko04066;path:ko04922;path:ko05230
ACg003173	K02889	path:ko03010
ACg003145	K03671
ACg001477	K00140	path:ko00280;path:ko00410;path:ko00562;path:ko00640;path:ko01100;path:ko01200
ACg004244	K01687	path:ko00290;path:ko00770;path:ko01100;path:ko01110;path:ko01130;path:ko01210;path:ko01230
ACg007750	K12860	path:ko03040
ACg006128	K00135	path:ko00250;path:ko00310;path:ko00350;path:ko00650;path:ko01100;path:ko01120
ACg000404	K03178	path:ko04120;path:ko05012
ACg006111	K03251	path:ko03013
ACg000100	K03029	path:ko03050;path:ko05169
ACg008182	K12870	path:ko03040
ACg000994	K02143	path:ko00190;path:ko01100
ACg005689	K14775
ACg000369	K00036	path:ko00030;path:ko00480;path:ko01100;path:ko01110;path:ko01120;path:ko01130;path:ko01200;path:ko05230
ACg001787	K03686
ACg001954	K01621	path:ko00030;path:ko00710;path:ko01100;path:ko01120
ACg007377	K03063	path:ko03050;path:ko05169
ACg001189	K03235
ACg001453	K18738
ACg005702	K15371	path:ko00220;path:ko00250;path:ko00430;path:ko00910;path:ko01100
ACg004401	K01624	path:ko00010;path:ko00030;path:ko00051;path:ko00680;path:ko00710;path:ko01100;path:ko01110;path:ko01120;path:ko01130;path:ko01200;path:ko01230
ACg003872	K00789	path:ko00270;path:ko01100;path:ko01110;path:ko01230
ACg004709	K06942
ACg000163	K14411	path:ko03015
ACg003151	K00856	path:ko00230;path:ko01100
ACg008396	K00940	path:ko00230;path:ko00240;path:ko01100;path:ko01110;path:ko01130
ACg002056	K13095
ACg008860	K00235	path:ko00020;path:ko00190;path:ko01100;path:ko01110;path:ko01120;path:ko01130;path:ko01200;path:ko04932;path:ko05010;path:ko05012;path:ko05016
ACg003443	K15979	path:ko05169;path:ko05203
ACg007842	K00012	path:ko00040;path:ko00053;path:ko00500;path:ko00520;path:ko01100
ACg008175	K11252	path:ko05034;path:ko05203;path:ko05322
ACg003973	K18749
ACg004115	K18732
ACg001427	K03259	path:ko03013;path:ko04066;path:ko04150;path:ko04151;path:ko04211;path:ko04910
ACg002483	K03065	path:ko03050;path:ko05169
ACg005613	K12493	path:ko04144
ACg003478	K00480	path:ko00621;path:ko00624;path:ko00626;path:ko01100;path:ko01120;path:ko01220
ACg004452	K09584	path:ko04141
ACg008712	K03809	path:ko00130;path:ko01110
ACg005585	K03942	path:ko00190;path:ko01100;path:ko04932;path:ko05010;path:ko05012;path:ko05016
ACg004239	K03522
ACg000518	K12827	path:ko03040
ACg001418	K00627	path:ko00010;path:ko00020;path:ko00620;path:ko01100;path:ko01110;path:ko01120;path:ko01130;path:ko01200
ACg002463	K03937	path:ko00190;path:ko01100;path:ko04932;path:ko05010;path:ko05012;path:ko05016
ACg005159	K03260	path:ko03013;path:ko05416
ACg004112	K02964	path:ko03010
ACg000741	K14005	path:ko04141
ACg002688	K05765	path:ko04360;path:ko04666;path:ko04810;path:ko05133
ACg006696	K01940	path:ko00220;path:ko00250;path:ko01100;path:ko01110;path:ko01130;path:ko01230
ACg005491	K18730
ACg006401	K03232
ACg000309	K02725	path:ko03050
ACg007032	K02183	path:ko04014;path:ko04015;path:ko04020;path:ko04022;path:ko04024;path:ko04070;path:ko04114;path:ko04261;path:ko04270;path:ko04626;path:ko04713;path:ko04720;path:ko04722;path:ko04728;path:ko04740;path:ko04744;path:ko04745;path:ko04750;path:ko04910;path:ko04912;path:ko04915;path:ko04916;path:ko04921;path:ko04922;path:ko04924;path:ko04925;path:ko04970;path:ko04971;path:ko05010;path:ko05031;path:ko05…
ACg004994	K03695	path:ko04213
ACg000736	K00799	path:ko00480;path:ko00980;path:ko00982;path:ko05204
ACg000243	K02938	path:ko03010
ACg007717	K03061	path:ko03050;path:ko05169
ACg008939	K03233	path:ko05134
ACg000978	K01251	path:ko00270;path:ko01100
ACg001768	K03936	path:ko00190;path:ko01100;path:ko04932;path:ko05010;path:ko05012;path:ko05016
ACg003786	K03687
ACg006412	K00819	path:ko00330;path:ko01100;path:ko01110;path:ko01130
ACg006941	K02953	path:ko03010
ACg006182	K00030	path:ko00020;path:ko01100;path:ko01110;path:ko01120;path:ko01130;path:ko01200;path:ko01210;path:ko01230
ACg000103	K09494
ACg000841	K03066	path:ko03050;path:ko05169
ACg002740	K01637	path:ko00630;path:ko01100;path:ko01110;path:ko01120;path:ko01200
ACg007561	K12659	path:ko00220;path:ko01100;path:ko01110;path:ko01130;path:ko01210;path:ko01230
ACg003896	K14563	path:ko03008
ACg003137	K02903	path:ko03010
ACg008180	K11252	path:ko05034;path:ko05203;path:ko05322
ACg004992	K00605	path:ko00260;path:ko00630;path:ko00670;path:ko01100;path:ko01110;path:ko01130;path:ko01200
ACg002703	K09554	path:ko04151
ACg003097	K13993	path:ko04141
ACg008395	K00417	path:ko00190;path:ko01100;path:ko04260;path:ko04932;path:ko05010;path:ko05012;path:ko05016
ACg002201	K11984	path:ko03040
ACg004942	K03064	path:ko03050;path:ko05169
ACg003785	K00288	path:ko00670;path:ko01100
ACg005867	K01835	path:ko00010;path:ko00030;path:ko00052;path:ko00230;path:ko00500;path:ko00520;path:ko00521;path:ko01100;path:ko01110;path:ko01120;path:ko01130
ACg003806	K05605	path:ko00280;path:ko00410;path:ko00640;path:ko01100;path:ko01200
ACg003270	K05349	path:ko00460;path:ko00500;path:ko00940;path:ko01100;path:ko01110
ACg008202	K15414	path:ko05168
ACg001877	K03245	path:ko03013
ACg008394	K00615	path:ko00030;path:ko00710;path:ko01051;path:ko01100;path:ko01110;path:ko01120;path:ko01130;path:ko01200;path:ko01230
ACg002036	K14209
ACg003016	K10752
ACg006422	K11843
ACg007001	K01803	path:ko00010;path:ko00051;path:ko00562;path:ko00710;path:ko01100;path:ko01110;path:ko01120;path:ko01130;path:ko01200;path:ko01230
ACg001838	K16365
ACg004912	K15304	path:ko05166
ACg006057	K02993	path:ko03010
ACg001603	K02985	path:ko03010
ACg008709	K03248	path:ko03013
ACg002880	K01784	path:ko00052;path:ko00520;path:ko01100
ACg003691	K17218	path:ko00920
ACg008112	K02998	path:ko03010
ACg000216	K00257	path:ko00281
ACg001527	K01836	path:ko00520;path:ko01100;path:ko01130
ACg002308	K18715
ACg003884	K12829	path:ko03040
ACg007353	K11252	path:ko05034;path:ko05203;path:ko05322
ACg003890	K02263	path:ko00190;path:ko01100;path:ko04260;path:ko04932;path:ko05010;path:ko05012;path:ko05016
ACg004164	K01772	path:ko00860;path:ko01100;path:ko01110
ACg006059	K18160
ACg008266	K09780
ACg007913	K00294	path:ko00250;path:ko00330;path:ko01100
ACg002588	K01626	path:ko00400;path:ko01100;path:ko01110;path:ko01130;path:ko01230
ACg001372	K01899	path:ko00020;path:ko00640;path:ko01100;path:ko01110;path:ko01120;path:ko01130;path:ko01200
ACg006612	K11372
ACg007695	K17427
ACg006901	K11649
ACg002112	K14729
ACg001506	K02960	path:ko03010
ACg002521	K09568
ACg002437	K01687	path:ko00290;path:ko00770;path:ko01100;path:ko01110;path:ko01130;path:ko01210;path:ko01230
ACg001700	K00290	path:ko00300;path:ko00310;path:ko01100;path:ko01110;path:ko01130;path:ko01230
ACg006967	K02955	path:ko03010
ACg007411	K01647	path:ko00020;path:ko00630;path:ko01100;path:ko01110;path:ko01120;path:ko01130;path:ko01200;path:ko01210;path:ko01230
ACg006535	K03263
ACg005211	K01955	path:ko00240;path:ko00250;path:ko01100
ACg004250	K18722
ACg001332	K01070	path:ko00680;path:ko01120;path:ko01200
ACg001727	K13192
ACg000874	K17679
ACg002011	K00432	path:ko00480;path:ko00590;path:ko04918
ACg003735	K06215	path:ko00750
ACg000204	K11294	path:ko05130
ACg000206	K17417
ACg003642	K11518	path:ko05014
ACg006538	K01626	path:ko00400;path:ko01100;path:ko01110;path:ko01130;path:ko01230
ACg003740	K01069	path:ko00620
ACg001440	K03247	path:ko03013;path:ko05162
ACg007797	K00311
ACg007688	K03627
ACg005319	K13237	path:ko04146
ACg008901	K17768
ACg000638	K00121	path:ko00010;path:ko00071;path:ko00350;path:ko00625;path:ko00626;path:ko00680;path:ko00830;path:ko00980;path:ko00982;path:ko01100;path:ko01110;path:ko01120;path:ko01130;path:ko01200;path:ko01220;path:ko05204
ACg004891	K02127	path:ko00190;path:ko01100;path:ko05010;path:ko05012;path:ko05016
ACg000786	K11658
ACg001711	K16945
ACg006832	K12881	path:ko03013;path:ko03015;path:ko03040;path:ko05168
ACg003351	K01610	path:ko00010;path:ko00020;path:ko00620;path:ko00710;path:ko01100;path:ko01110;path:ko01120;path:ko01130;path:ko01200
ACg004193	K12819	path:ko03040
ACg003491	K02870	path:ko03010
ACg001581	K01792	path:ko00010;path:ko01100;path:ko01110;path:ko01120;path:ko01130
ACg000354	K01301
ACg008682	K02908	path:ko03010
ACg004962	K02977	path:ko03010
ACg005885	K02901	path:ko03010
ACg001906	K08675
ACg001606	K03949	path:ko00190;path:ko01100;path:ko04932;path:ko05010;path:ko05012;path:ko05016
ACg004555	K17945
ACg008188	K12870	path:ko03040
ACg000666	K12462	path:ko04722;path:ko04962
ACg004292	K01738	path:ko00270;path:ko00920;path:ko01100;path:ko01110;path:ko01120;path:ko01130;path:ko01200;path:ko01230
ACg000512	K12833	path:ko03040
ACg006871	K13953	path:ko00010;path:ko00071;path:ko00350;path:ko00625;path:ko00626;path:ko00830;path:ko00980;path:ko00982;path:ko01100;path:ko01110;path:ko01120;path:ko01130;path:ko01220
ACg003356	K05661	path:ko02010
ACg005651	K00384	path:ko00240;path:ko00450
ACg000599	K00818	path:ko00220;path:ko01100;path:ko01110;path:ko01130;path:ko01210;path:ko01230
ACg008705	K01810	path:ko00010;path:ko00030;path:ko00500;path:ko00520;path:ko01100;path:ko01110;path:ko01120;path:ko01130;path:ko01200
ACg002002	K03062	path:ko03050;path:ko05169;path:ko05203
ACg001170	K17065	path:ko04139;path:ko04668
ACg005725	K03189
ACg001622	K01876	path:ko00970
ACg000862	K03105	path:ko03060
ACg008349	K09500
ACg003830	K05757	path:ko04144;path:ko04666;path:ko04810;path:ko05100;path:ko05130;path:ko05131;path:ko05132
ACg007404	K10396	path:ko04144;path:ko04728
ACg005356	K11142	path:ko00330;path:ko00480;path:ko01100
ACg001873	K18655
ACg004042	K16938	path:ko05100
ACg007954	K12158
ACg001894	K17785
ACg002365	K00624	path:ko04146
ACg003105	K08139	path:ko04113
ACg006256	K01301
ACg001278	K15026
ACg001720	K00826	path:ko00270;path:ko00280;path:ko00290;path:ko00770;path:ko01100;path:ko01110;path:ko01130;path:ko01210;path:ko01230
ACg008301	K01336
ACg007696	K01173	path:ko04210
ACg003588	K12562	path:ko04144;path:ko04666
ACg000356	K03138	path:ko03022
ACg001062	K12843	path:ko03040
ACg000059	K14397	path:ko03015
ACg009044	K12614	path:ko03018
ACg003888	K02135	path:ko00190;path:ko01100;path:ko05010;path:ko05012;path:ko05016
ACg009112	K14015	path:ko04141
ACg003759	K02731	path:ko03050
ACg000496	K07374	path:ko04145;path:ko04210;path:ko04540;path:ko05130
ACg008147	K15263
ACg008761	K17786
ACg000495	K07374	path:ko04145;path:ko04210;path:ko04540;path:ko05130
ACg003991	K14326	path:ko03013;path:ko03015
ACg003099	K13993	path:ko04141
ACg001382	K06053	path:ko04330;path:ko05169;path:ko05203
ACg008171	K00799	path:ko00480;path:ko00980;path:ko00982;path:ko05204
ACg001151	K06875
ACg005611	K04649	path:ko04120
ACg000319	K02935	path:ko03010
ACg002066	K01655	path:ko00300;path:ko00620;path:ko01100;path:ko01120;path:ko01130;path:ko01210;path:ko01230
ACg004560	K06874
ACg004736	K02958	path:ko03010
ACg001933	K02930	path:ko03010
ACg007686	K00102	path:ko00620
ACg004527	K02966	path:ko03010
ACg003865	K12871	path:ko03040
ACg000137	K04499	path:ko04310
ACg004187	K01720	path:ko00640
ACg007967	K14297	path:ko03013;path:ko05164
ACg006815	K00820	path:ko00250;path:ko00520;path:ko01100;path:ko01130;path:ko04931
ACg002926	K00273	path:ko00260;path:ko00311;path:ko00330;path:ko00472;path:ko01100;path:ko01130;path:ko04146
ACg004223	K14826
ACg003913	K02906	path:ko03010
ACg000603	K05824	path:ko00300;path:ko01100;path:ko01120;path:ko01130;path:ko01210;path:ko01230
ACg006060	K11173
ACg003809	K04487	path:ko00730;path:ko01100;path:ko04122
ACg002173	K01259	path:ko00330
ACg001099	K03943	path:ko00190;path:ko01100;path:ko04932;path:ko05010;path:ko05012;path:ko05016
ACg004741	K07101
ACg001748	K01620	path:ko00260;path:ko01100;path:ko01110;path:ko01120;path:ko01130;path:ko01230
ACg008140	K11088	path:ko03040;path:ko04139;path:ko05322
ACg003779	K03841	path:ko00010;path:ko00030;path:ko00051;path:ko00680;path:ko00710;path:ko01100;path:ko01110;path:ko01120;path:ko01130;path:ko01200;path:ko04152;path:ko04910
ACg004731	K11251	path:ko05034;path:ko05322
ACg007752	K17788
ACg003303	K01439	path:ko00300;path:ko01100;path:ko01120;path:ko01230
ACg005607	K00228	path:ko00860;path:ko01100;path:ko01110
ACg008683	K00381	path:ko00920;path:ko01100;path:ko01120
ACg000344	K02984	path:ko03010
ACg005879	K03238	path:ko03013
ACg007959	K14324	path:ko03013;path:ko03015
ACg004693	K17781
ACg008284	K00074	path:ko00360;path:ko00362;path:ko00650;path:ko01100;path:ko01120
ACg001369	K17413
ACg006225	K16833
ACg008592	K15633	path:ko00010;path:ko00260;path:ko00680;path:ko01100;path:ko01110;path:ko01120;path:ko01130;path:ko01200;path:ko01230
ACg006223	K11885
ACg004699	K15627	path:ko05202
ACg000456	K03267	path:ko03015
ACg005803	K00418	path:ko00190;path:ko01100;path:ko04260;path:ko04932;path:ko05010;path:ko05012;path:ko05016
ACg008951	K02894	path:ko03010
ACg000576	K14396	path:ko03015;path:ko05164
ACg003337	K02989	path:ko03010
ACg001528	K15296	path:ko04721
ACg006623	K04705	path:ko04144;path:ko04630
ACg003664	K07936	path:ko03008;path:ko03013;path:ko05166;path:ko05169
ACg003657	K02952	path:ko03010
ACg000284	K08678	path:ko00500;path:ko00520;path:ko01100
ACg008167	K07393
ACg007871	K01711	path:ko00051;path:ko00520;path:ko01100
ACg007066	K10685	path:ko04120
ACg000531	K14294	path:ko03013;path:ko03015
ACg002321	K03246	path:ko03013
ACg000904	K00817	path:ko00340;path:ko00350;path:ko00360;path:ko00400;path:ko00401;path:ko00960;path:ko01100;path:ko01110;path:ko01130;path:ko01230
ACg008750	K13993	path:ko04141
ACg006911	K12881	path:ko03013;path:ko03015;path:ko03040;path:ko05168
ACg002101	K18584
ACg005680	K03521
ACg003687	K15303	path:ko00980
ACg002963	K01265
ACg005116	K12863	path:ko03040
ACg000676	K14306	path:ko03013
ACg001098	K03083	path:ko04012;path:ko04062;path:ko04110;path:ko04151;path:ko04310;path:ko04340;path:ko04360;path:ko04390;path:ko04510;path:ko04550;path:ko04660;path:ko04662;path:ko04711;path:ko04722;path:ko04728;path:ko04910;path:ko04916;path:ko04917;path:ko04919;path:ko04931;path:ko04932;path:ko05010;path:ko05160;path:ko05162;path:ko05164;path:ko05166;path:ko05169;path:ko05200;path:ko05210;path:ko05213;path:ko05…
ACg002209	K02265	path:ko00190;path:ko01100;path:ko04260;path:ko04932;path:ko05010;path:ko05012;path:ko05016
ACg003505	K09184
ACg002253	K06694
ACg003719	K06911
ACg005561	K12605	path:ko03018
ACg008273	K07078
ACg003790	K10686	path:ko04120
ACg004289	K10839	path:ko03420;path:ko04141
ACg003328	K03646
ACg003767	K01652	path:ko00290;path:ko00650;path:ko00660;path:ko00770;path:ko01100;path:ko01110;path:ko01130;path:ko01210;path:ko01230
ACg004612	K15177
ACg001868	K02947	path:ko03010
ACg007413	K11838	path:ko04068;path:ko05168;path:ko05169;path:ko05203
ACg003254	K02141	path:ko00190;path:ko01100
ACg007448	K14454	path:ko00220;path:ko00250;path:ko00270;path:ko00330;path:ko00350;path:ko00360;path:ko00400;path:ko00710;path:ko00950;path:ko00960;path:ko01100;path:ko01110;path:ko01120;path:ko01130;path:ko01200;path:ko01210;path:ko01230
ACg000270	K08288	path:ko04141
ACg002474	K17081
ACg001858	K08762	path:ko03320
ACg006139	K19475	path:ko04144
ACg002909	K02357
ACg001167	K12840	path:ko03040
ACg007839	K07511	path:ko00062;path:ko00071;path:ko00280;path:ko00310;path:ko00380;path:ko00410;path:ko00627;path:ko00640;path:ko00650;path:ko00930;path:ko01100;path:ko01110;path:ko01120;path:ko01130;path:ko01200;path:ko01212
ACg001546	K12795	path:ko04621;path:ko04626
ACg000674	K02727	path:ko03050
ACg003256	K11251	path:ko05034;path:ko05322
ACg001773	K11290
ACg006718	K12876	path:ko03013;path:ko03015;path:ko03040
ACg001500	K02873	path:ko03010
ACg008176	K11251	path:ko05034;path:ko05322
ACg005881	K14308	path:ko03013
ACg004202	K08963	path:ko00270;path:ko01100
ACg004229	K19704	path:ko04011
ACg008684	K00830	path:ko00250;path:ko00260;path:ko00630;path:ko00680;path:ko01100;path:ko01110;path:ko01120;path:ko01130;path:ko01200;path:ko04146
ACg004334	K12830	path:ko03040
ACg002040	K09497
ACg003154	K06253	path:ko04151;path:ko04510;path:ko04512
ACg006887	K18160
ACg007238	K03386
ACg003279	K11650
ACg008817	K00254	path:ko00240;path:ko01100
ACg000387	K02940	path:ko03010
ACg004948	K13103
ACg008138	K02728	path:ko03050
ACg001945	K14298	path:ko03013;path:ko05164
ACg007308	K17424
ACg007888	K14407	path:ko03015
ACg004739	K02152	path:ko00190;path:ko01100;path:ko04145;path:ko04721;path:ko04966;path:ko05110;path:ko05120;path:ko05323
ACg004562	K17804
ACg007130	K14171	path:ko04122
ACg006777	K00789	path:ko00270;path:ko01100;path:ko01110;path:ko01230
ACg004285	K13220
ACg000573	K00249	path:ko00071;path:ko00280;path:ko00410;path:ko00640;path:ko01100;path:ko01110;path:ko01130;path:ko01200;path:ko01212;path:ko03320
ACg007184	K02946	path:ko03010
ACg006260	K00052	path:ko00290;path:ko00660;path:ko01100;path:ko01110;path:ko01210;path:ko01230
ACg000383	K05351	path:ko00040;path:ko01100
ACg006153	K01381
ACg007608	K04532	path:ko05010
ACg006255	K18798
ACg000626	K01969	path:ko00280;path:ko01100
ACg004883	K17757
ACg000207	K02730	path:ko03050
ACg008521	K14328	path:ko03013;path:ko03015
ACg000250	K04564	path:ko04068;path:ko04146;path:ko04211;path:ko04212;path:ko04213;path:ko05016
ACg008563	K04523	path:ko04141
ACg008148	K08343	path:ko04140
ACg002305	K13115
ACg002852	K08853
ACg005616	K00766	path:ko00400;path:ko01100;path:ko01110;path:ko01130;path:ko01230
ACg006905	K02900	path:ko03010
ACg007243	K00480	path:ko00621;path:ko00624;path:ko00626;path:ko01100;path:ko01120;path:ko01220
ACg001654	K11096	path:ko03040
ACg008229	K01535	path:ko00190
ACg003199	K08286
ACg000315	K02725	path:ko03050
ACg005865	K15172
ACg003322	K00963	path:ko00040;path:ko00052;path:ko00500;path:ko00520;path:ko01100;path:ko01130
ACg008597	K09495
ACg001212	K00383	path:ko00480;path:ko04918
ACg003891	K03038	path:ko03050;path:ko05169
ACg001337	K12826	path:ko03040
ACg009128	K13137	path:ko03013
ACg001775	K11092	path:ko03040
ACg007690	K18721
ACg008177	K00003	path:ko00260;path:ko00270;path:ko00300;path:ko01100;path:ko01110;path:ko01120;path:ko01130;path:ko01230
ACg002460	K02880	path:ko03010
ACg005380	K12196	path:ko04144
ACg001561	K03939	path:ko00190;path:ko01100;path:ko04932;path:ko05010;path:ko05012;path:ko05016
ACg001503	K00058	path:ko00260;path:ko00680;path:ko01100;path:ko01120;path:ko01130;path:ko01200;path:ko01230
ACg008023	K06185
ACg003462	K00971	path:ko00051;path:ko00520;path:ko01100;path:ko01110
ACg002306	K02969	path:ko03010
ACg000539	K02867	path:ko03010
ACg008098	K13127
ACg006280	K03941	path:ko00190;path:ko01100;path:ko04932;path:ko05010;path:ko05012;path:ko05016
ACg006938	K18097	path:ko00561;path:ko01100
ACg006335	K18932
ACg007080	K08254
ACg005006	K09527
ACg001341	K17402
ACg003568	K03768
ACg003327	K01956	path:ko00240;path:ko00250;path:ko01100
ACg002283	K18159
ACg006241	K03965	path:ko00190;path:ko01100;path:ko04932;path:ko05010;path:ko05012;path:ko05016
ACg001571	K04082
ACg007372	K03113	path:ko03013
ACg005426	K12562	path:ko04144;path:ko04666
ACg007655	K12160	path:ko03013
ACg004197	K00958	path:ko00230;path:ko00261;path:ko00450;path:ko00920;path:ko01100;path:ko01120;path:ko01130
ACg001435	K13343	path:ko04146
ACg004834	K09584	path:ko04141
ACg002159	K12734
ACg008584	K02264	path:ko00190;path:ko01100;path:ko04260;path:ko04932;path:ko05010;path:ko05012;path:ko05016
ACg006214	K12857	path:ko03040
ACg005119	K06867
ACg003318	K09498
ACg008358	K02967	path:ko03010
ACg006500	K00826	path:ko00270;path:ko00280;path:ko00290;path:ko00770;path:ko01100;path:ko01110;path:ko01130;path:ko01210;path:ko01230
ACg002445	K17807
ACg008681	K11768
ACg006688	K07390
ACg007034	K03564
ACg000252	K00844	path:ko00010;path:ko00051;path:ko00052;path:ko00500;path:ko00520;path:ko00521;path:ko00524;path:ko01100;path:ko01110;path:ko01120;path:ko01130;path:ko01200;path:ko04066;path:ko04910;path:ko04930;path:ko04973;path:ko05230
ACg001648	K18106	path:ko00040;path:ko01100
ACg007185	K01469	path:ko00480
ACg003927	K03094	path:ko04110;path:ko04111;path:ko04114;path:ko04120;path:ko04141;path:ko04310;path:ko04350;path:ko04710;path:ko05168
ACg006277	K11353	path:ko00190;path:ko01100;path:ko04932;path:ko05010;path:ko05012;path:ko05016
ACg005278	K13501	path:ko00400;path:ko01100;path:ko01110;path:ko01130;path:ko01230
ACg004259	K11863	path:ko04141
ACg006067	K01889	path:ko00970
ACg007065	K02150	path:ko00190;path:ko01100;path:ko04145;path:ko04721;path:ko04966;path:ko05110;path:ko05120;path:ko05323
ACg006706	K13109
ACg005436	K01749	path:ko00860;path:ko01100;path:ko01110
ACg007260	K14004	path:ko03013;path:ko04141
ACg000487	K17770
ACg000262	K14538	path:ko03008
ACg002689	K01720	path:ko00640
ACg007134	K03946	path:ko00190;path:ko01100;path:ko04932;path:ko05010;path:ko05012;path:ko05016
ACg005420	K14811
ACg004307	K17805
ACg008738	K01191	path:ko00511
ACg007811	K02957	path:ko03010
ACg004733	K17425
ACg005707	K02893	path:ko03010
ACg002122	K17550
ACg004673	K18179
ACg001969	K14002	path:ko04141
ACg002715	K03953	path:ko00190;path:ko01100;path:ko04932;path:ko05010;path:ko05012;path:ko05016
ACg003580	K02996	path:ko03010
ACg009008	K00921	path:ko00562;path:ko04070;path:ko04145;path:ko04810
ACg004531	K01568	path:ko00010;path:ko01100;path:ko01110;path:ko01130
ACg006803	K02988	path:ko03010
ACg003952	K02737	path:ko03050
ACg002263	K03366	path:ko00650
ACg006527	K00968	path:ko00440;path:ko00564;path:ko01100;path:ko05231
ACg008373	K09493
ACg008030	K02951	path:ko03010
ACg007182	K16948
ACg002414	K17759
ACg002271	K07375	path:ko04145;path:ko04540;path:ko05130
ACg003671	K08955	path:ko04139
ACg006073	K01890	path:ko00970
ACg004416	K06666	path:ko04011;path:ko04111
ACg007467	K17656
ACg006584	K15102
ACg006457	K03950	path:ko00190;path:ko01100;path:ko04932;path:ko05010;path:ko05012;path:ko05016
ACg001586	K02974	path:ko03010
ACg007887	K08333	path:ko04140
ACg004634	K02140	path:ko00190;path:ko01100
ACg007729	K01515	path:ko00230
ACg002878	K09578	path:ko04622
ACg006187	K14152	path:ko00340;path:ko01100;path:ko01110;path:ko01230
ACg005686	K02931	path:ko03010
ACg008433	K07575
ACg007758	K11128	path:ko03008
ACg002144	K02941	path:ko03010
ACg004571	K07512	path:ko00062;path:ko01100;path:ko01212
ACg006678	K06911
ACg005203	K15223
ACg004606	K11835
ACg007262	K01082	path:ko00920;path:ko01100;path:ko01120;path:ko01130
ACg008409	K13099
ACg004385	K01597	path:ko00900;path:ko01100;path:ko01110;path:ko01130
ACg000605	K13535	path:ko00564
ACg004776	K04409	path:ko04010;path:ko04011;path:ko04012;path:ko04014;path:ko04024;path:ko04062;path:ko04360;path:ko04510;path:ko04650;path:ko04660;path:ko04666;path:ko04810;path:ko05120;path:ko05205;path:ko05211
ACg007391	K00555
ACg001482	K15109
ACg006680	K01923	path:ko00230;path:ko01100;path:ko01110;path:ko01130
ACg000422	K03030	path:ko03050;path:ko05169
ACg001697	K03644	path:ko00785;path:ko01100
ACg003950	K12845	path:ko03008;path:ko03040
ACg004890	K17065	path:ko04139;path:ko04668
ACg002856	K14405	path:ko03015
ACg006494	K01869	path:ko00970
ACg002224	K01874	path:ko00450;path:ko00970
ACg007175	K02736	path:ko03050
ACg002974	K03676
ACg003052	K11254	path:ko05034;path:ko05203;path:ko05322
ACg005525	K01802
ACg003230	K00688	path:ko00500;path:ko01100;path:ko01110;path:ko04910;path:ko04922;path:ko04931
ACg000864	K09613
ACg003926	K02899	path:ko03010
ACg007075	K00452	path:ko00380;path:ko01100
ACg006907	K06948
ACg001771	K01012	path:ko00780;path:ko01100
ACg006188	K11593
ACg001916	K14307	path:ko03013
ACg008404	K02937	path:ko03010
ACg006443	K09486	path:ko04141
ACg002536	K12855	path:ko03040
ACg000350	K11493
ACg003765	K01557	path:ko00350;path:ko01100;path:ko01120
ACg000704	K14561	path:ko03008
ACg003883	K01649	path:ko00290;path:ko00620;path:ko01100;path:ko01110;path:ko01210;path:ko01230
ACg005597	K02139	path:ko00190;path:ko01100
ACg008912	K03145
ACg006236	K10416	path:ko04145;path:ko04962;path:ko05132
ACg004762	K01697	path:ko00260;path:ko00270;path:ko01100;path:ko01130;path:ko01230
ACg007564	K02923	path:ko03010
ACg001577	K00616	path:ko00030;path:ko01100;path:ko01110;path:ko01120;path:ko01130;path:ko01200;path:ko01230
ACg007718	K18669	path:ko04111
ACg008874	K02896	path:ko03010
ACg003077	K15732
ACg001870	K01673	path:ko00910
ACg007713	K02876	path:ko03010
ACg005912	K00031	path:ko00020;path:ko00480;path:ko00720;path:ko01100;path:ko01110;path:ko01120;path:ko01130;path:ko01200;path:ko01210;path:ko01230;path:ko04146
ACg006906	K03008	path:ko00230;path:ko00240;path:ko01100;path:ko03020;path:ko05016;path:ko05169
ACg002442	K03146	path:ko00730;path:ko01100
ACg007370	K15425
ACg004022	K15859	path:ko02020
ACg007188	K12471	path:ko04144
ACg005832	K01895	path:ko00010;path:ko00620;path:ko00640;path:ko00680;path:ko00720;path:ko01100;path:ko01110;path:ko01120;path:ko01130;path:ko01200
ACg008660	K08773	path:ko04014;path:ko05200;path:ko05212
ACg000734	K02875	path:ko03010
ACg001612	K02912	path:ko03010
ACg005413	K03262	path:ko03013
ACg000277	K03948	path:ko00190;path:ko01100;path:ko04932;path:ko05010;path:ko05012;path:ko05016
ACg000391	K06176
ACg001977	K00850	path:ko00010;path:ko00030;path:ko00051;path:ko00052;path:ko00680;path:ko01100;path:ko01110;path:ko01120;path:ko01130;path:ko01200;path:ko01230;path:ko03018;path:ko04152;path:ko05230
ACg001496	K03130	path:ko03022;path:ko05168
ACg008810	K10418	path:ko04962
ACg006574	K11253	path:ko05034;path:ko05202;path:ko05322
ACg001374	K02959	path:ko03010
ACg004139	K14154	path:ko00730;path:ko01100
ACg000475	K12194	path:ko04144
ACg007273	K18914
ACg000368	K13174	path:ko03013
ACg001738	K19054	path:ko00860
ACg004321	K03126	path:ko03022
ACg007381	K03626
ACg002656	K06072
ACg006614	K00864	path:ko00561;path:ko01100;path:ko03320;path:ko04626
ACg003841	K00764	path:ko00230;path:ko00250;path:ko01100;path:ko01110;path:ko01130
ACg002285	K01705	path:ko00300;path:ko01100;path:ko01120;path:ko01130;path:ko01210;path:ko01230
ACg002450	K17362
ACg004671	K00129	path:ko00010;path:ko00340;path:ko00350;path:ko00360;path:ko00410;path:ko00980;path:ko00982;path:ko01100;path:ko01110;path:ko01120;path:ko05204
ACg005007	K00059	path:ko00061;path:ko00780;path:ko01040;path:ko01100;path:ko01212
ACg007198	K01417
ACg004330	K09569
ACg006025	K01875	path:ko00970
ACg005604	K10436
ACg000220	K03243	path:ko03013
ACg007214	K11541	path:ko00240;path:ko00250;path:ko01100
ACg002865	K14567	path:ko03008
ACg008583	K12897	path:ko03040
ACg008927	K11090	path:ko05322
ACg001275	K15175
ACg004408	K03237	path:ko03013;path:ko04141;path:ko04210;path:ko04932;path:ko05160;path:ko05162;path:ko05164;path:ko05168
ACg007699	K17608
ACg007849	K01640	path:ko00072;path:ko00280;path:ko00281;path:ko00650;path:ko01100;path:ko04146
ACg004461	K02180	path:ko04110;path:ko04111;path:ko05166
ACg002309	K05019	path:ko03013
ACg006624	K10704
ACg008190	K00573
ACg006986	K13303	path:ko04068;path:ko04151
ACg006462	K03242	path:ko03013
ACg003908	K14016	path:ko04141
ACg001807	K06067	path:ko04110;path:ko04213;path:ko04330;path:ko04919;path:ko05016;path:ko05034;path:ko05169;path:ko05200;path:ko05202;path:ko05203;path:ko05220
ACg006084	K13176	path:ko03013
ACg000672	K02738	path:ko03050
ACg000625	K12844	path:ko03040
ACg005378	K12182	path:ko04144;path:ko04145
ACg002705	K09265	path:ko04011
ACg002006	K17498
ACg000074	K00293	path:ko00300;path:ko00310;path:ko01100;path:ko01110;path:ko01130;path:ko01230
ACg003591	K01866	path:ko00970
ACg004355	K02831	path:ko04111;path:ko04113
ACg001005	K02882	path:ko03010
ACg000306	K00128	path:ko00010;path:ko00040;path:ko00053;path:ko00071;path:ko00280;path:ko00310;path:ko00330;path:ko00340;path:ko00380;path:ko00410;path:ko00561;path:ko00620;path:ko00625;path:ko00903;path:ko01100;path:ko01110;path:ko01120;path:ko01130
ACg008410	K10875	path:ko03440
ACg003979	K12733	path:ko03040
ACg006228	K06027	path:ko04721;path:ko04727;path:ko04962
ACg002485	K11344
ACg007157	K05906	path:ko00900;path:ko01130
ACg007106	K13577	path:ko04964
ACg003885	K03257	path:ko03013
ACg005284	K04464	path:ko04010;path:ko04011;path:ko04139;path:ko04540;path:ko04722;path:ko04912;path:ko04921;path:ko05206
ACg006998	K01880	path:ko00970
ACg007764	K12191	path:ko04144
ACg006806	K14007	path:ko04141
ACg008458	K01613	path:ko00564;path:ko01100;path:ko01110
ACg008658	K11086	path:ko03040;path:ko05322
ACg001197	K03265	path:ko03015
ACg005401	K09043
ACg006086	K03952	path:ko00190;path:ko01100;path:ko04932;path:ko05010;path:ko05012;path:ko05016
ACg002468	K04565	path:ko04146;path:ko04213;path:ko05014;path:ko05016;path:ko05020
ACg003536	K11805
ACg004170	K01183	path:ko00520;path:ko01100
ACg001878	K14791
ACg001692	K02891	path:ko03010
ACg008675	K17919	path:ko04144
ACg002830	K01104
ACg004417	K13106
ACg001815	K05841
ACg008464	K03108	path:ko03060
ACg003015	K05747	path:ko04062;path:ko04144;path:ko04520;path:ko04666;path:ko04810;path:ko05100;path:ko05130;path:ko05131;path:ko05132;path:ko05231
ACg000828	K00762	path:ko00240;path:ko01100
ACg006050	K01495	path:ko00790;path:ko01100
ACg000096	K11087	path:ko03040;path:ko05322
ACg003040	K09499
ACg001378	K02266	path:ko00190;path:ko01100;path:ko04260;path:ko04932;path:ko05010;path:ko05012;path:ko05016
ACg004679	K11093	path:ko03040
ACg002737	K10364	path:ko04144
ACg001691	K11131	path:ko03008
ACg009094	K04802	path:ko03030;path:ko03410;path:ko03420;path:ko03430;path:ko04110;path:ko05161;path:ko05166
ACg000271	K02975	path:ko03010
ACg005723	K01535	path:ko00190
ACg005397	K11786
ACg004111	K01872	path:ko00970
ACg001147	K03027	path:ko00230;path:ko00240;path:ko01100;path:ko03020;path:ko04623;path:ko05169
ACg001345	K11788	path:ko00230;path:ko01100;path:ko01110;path:ko01130
ACg006683	K00480	path:ko00621;path:ko00624;path:ko00626;path:ko01100;path:ko01120;path:ko01220
ACg001790	K15308	path:ko05166
ACg005350	K17263
ACg005519	K07555
ACg004789	K03012	path:ko00230;path:ko00240;path:ko01100;path:ko03020;path:ko05016;path:ko05169
ACg007368	K02971	path:ko03010
ACg004714	K14571	path:ko03008
ACg002148	K00697	path:ko00500;path:ko01100
ACg002911	K01412
ACg004474	K11232	path:ko02020;path:ko04011
ACg001540	K13091
ACg006326	K01785	path:ko00010;path:ko00052;path:ko01100;path:ko01110;path:ko01120;path:ko01130
ACg000880	K00143	path:ko00300;path:ko00310;path:ko01100;path:ko01110;path:ko01130;path:ko01230
ACg001502	K01663	path:ko00340;path:ko01100;path:ko01110;path:ko01230
ACg006333	K03139	path:ko03022
ACg004587	K17917	path:ko04144
ACg006516	K14411	path:ko03015
ACg001205	K19366	path:ko04144
ACg000415	K15135
ACg003909	K09496
ACg002476	K15102
ACg003246	K08286
ACg000011	K11339
ACg008113	K02564	path:ko00520;path:ko01100
ACg001611	K06990
ACg003004	K05355	path:ko00900;path:ko01110
ACg007002	K01809	path:ko00051;path:ko00520;path:ko01100;path:ko01110
ACg001675	K11676
ACg006134	K02932	path:ko03010
ACg004798	K11673
ACg008911	K12862	path:ko03040
ACg003321	K00963	path:ko00040;path:ko00052;path:ko00500;path:ko00520;path:ko01100;path:ko01130
ACg002018	K14838
ACg002458	K11343
ACg008872	K07119
ACg004398	K02866	path:ko03010
ACg005184	K13113	path:ko04212
ACg002612	K18042
ACg007376	K12883	path:ko03013;path:ko03015;path:ko03040
ACg005559	K12471	path:ko04144
ACg007450	K01755	path:ko00220;path:ko00250;path:ko01100;path:ko01110;path:ko01130;path:ko01230
ACg008651	K00942	path:ko00230;path:ko01100
ACg000304	K02726	path:ko03050
ACg000538	K05994
ACg004552	K05609
ACg007747	K14856
ACg003674	K01277
ACg000587	K18178
ACg008024	K02865	path:ko03010
ACg001677	K18532	path:ko00230;path:ko01100;path:ko01110;path:ko01130;path:ko03008
ACg006652	K11253	path:ko05034;path:ko05202;path:ko05322
ACg005425	K14574	path:ko03008
ACg002995	K04536	path:ko04011;path:ko04014;path:ko04062;path:ko04151;path:ko04713;path:ko04723;path:ko04724;path:ko04725;path:ko04726;path:ko04727;path:ko04728;path:ko04740;path:ko04744;path:ko05032;path:ko05034;path:ko05200
ACg000288	K14565	path:ko03008
ACg007298	K17970
ACg003705	K01265
ACg001812	K02978	path:ko03010
ACg002988	K17421
ACg005870	K13125
ACg005909	K03783	path:ko00230;path:ko00240;path:ko00760;path:ko01100;path:ko01110
ACg004591	K12662	path:ko03040
ACg004540	K00968	path:ko00440;path:ko00564;path:ko01100;path:ko05231
ACg006192	K02920	path:ko03010
ACg008560	K01968	path:ko00280;path:ko01100
ACg001907	K09788
ACg006463	K00752
ACg001982	K03964	path:ko00190;path:ko01100;path:ko04932;path:ko05010;path:ko05012;path:ko05016
ACg002084	K01427	path:ko00220;path:ko00230;path:ko00791;path:ko01100;path:ko01120
ACg000261	K12897	path:ko03040
ACg005338	K02961	path:ko03010
ACg001330	K14539	path:ko03008
ACg005371	K17404
ACg007245	K03254	path:ko03013
ACg007947	K00133	path:ko00260;path:ko00261;path:ko00270;path:ko00300;path:ko01100;path:ko01110;path:ko01120;path:ko01130;path:ko01210;path:ko01230
ACg000751	K14679
ACg004758	K12391	path:ko04142
ACg006136	K12864	path:ko03040
ACg001686	K00601	path:ko00230;path:ko00670;path:ko01100;path:ko01110;path:ko01130
ACg000706	K17774	path:ko04139
ACg001388	K10598	path:ko04120
ACg007423	K10088	path:ko04141
ACg004868	K13123
ACg000679	K12811	path:ko03040
ACg001202	K12831	path:ko03040
ACg003688	K18342
ACg006159	K02918	path:ko03010
ACg005917	K11761
ACg007350	K00831	path:ko00260;path:ko00680;path:ko00750;path:ko01100;path:ko01120;path:ko01130;path:ko01200;path:ko01230
ACg007734	K13800	path:ko00240;path:ko01100
ACg000732	K19720	path:ko04611;path:ko04933;path:ko04974;path:ko05146
ACg008758	K01809	path:ko00051;path:ko00520;path:ko01100;path:ko01110
ACg007469	K02519
ACg000219	K18573
ACg000761	K03259	path:ko03013;path:ko04066;path:ko04150;path:ko04151;path:ko04211;path:ko04910
ACg007339	K11292
ACg007837	K00814	path:ko00220;path:ko00250;path:ko00710;path:ko01100;path:ko01120;path:ko01200;path:ko01210;path:ko01230
ACg003247	K01756	path:ko00230;path:ko00250;path:ko01100;path:ko01110;path:ko01130
ACg001505	K02926	path:ko03010
ACg000408	K14325	path:ko03013;path:ko03015
ACg001415	K13118
ACg006521	K12626	path:ko03018;path:ko03040
ACg008330	K12623	path:ko03018;path:ko03040
ACg003957	K00167	path:ko00280;path:ko00640;path:ko01100;path:ko01110;path:ko01130
ACg008546	K11253	path:ko05034;path:ko05202;path:ko05322
ACg002976	K03935	path:ko00190;path:ko01100;path:ko04932;path:ko05010;path:ko05012;path:ko05016
ACg001358	K12199	path:ko04144
ACg004653	K10884	path:ko03450
ACg000461	K18097	path:ko00561;path:ko01100
ACg006360	K07304
ACg000131	K08726	path:ko00590;path:ko00625;path:ko01100;path:ko01120;path:ko04146
ACg007901	K03885	path:ko00190
ACg008126	K02973	path:ko03010
ACg003918	K07953	path:ko04141;path:ko05134
ACg006599	K00620	path:ko00220;path:ko01100;path:ko01110;path:ko01130;path:ko01210;path:ko01230
ACg002758	K00166	path:ko00280;path:ko00640;path:ko01100;path:ko01110;path:ko01130
ACg002575	K02933	path:ko03010
ACg008122	K01754	path:ko00260;path:ko00290;path:ko01100;path:ko01110;path:ko01130;path:ko01200;path:ko01230
ACg008009	K17302
ACg001127	K06689	path:ko04120;path:ko04141
ACg002923	K15117
ACg000467	K07566
ACg007851	K02734	path:ko03050
ACg000787	K02976	path:ko03010
ACg008520	K12868	path:ko03040
ACg001601	K14559	path:ko03008
ACg006262	K05756	path:ko04144;path:ko04666;path:ko04810;path:ko05100;path:ko05130;path:ko05131;path:ko05132
ACg004917	K03505	path:ko00230;path:ko00240;path:ko01100;path:ko03030;path:ko03410;path:ko03420;path:ko03430;path:ko03440;path:ko05166
ACg005515	K03801	path:ko00785;path:ko01100
ACg003804	K07466	path:ko03030;path:ko03420;path:ko03430;path:ko03440;path:ko03460
ACg004264	K00823	path:ko00250;path:ko00410;path:ko00640;path:ko00650;path:ko01100
ACg003551	K14753	path:ko05162
ACg006920	K01887	path:ko00970
ACg001635	K00326	path:ko00520
ACg008066	K01952	path:ko00230;path:ko01100;path:ko01110;path:ko01130
ACg003737	K17430
ACg004523	K10807	path:ko00230;path:ko00240;path:ko00480;path:ko01100
ACg007431	K01556	path:ko00380;path:ko01100
ACg007252	K02355
ACg006261	K11883	path:ko03008
ACg000521	K12197	path:ko04144
ACg004727	K12837	path:ko03040
ACg007209	K17069	path:ko00270;path:ko00920;path:ko01100;path:ko01110;path:ko01120;path:ko01130;path:ko01200;path:ko01230
ACg005501	K00974	path:ko03013
ACg006784	K12627	path:ko03018;path:ko03040
ACg006426	K10753
ACg008336	K17496
ACg008586	K01892	path:ko00970
ACg003388	K00480	path:ko00621;path:ko00624;path:ko00626;path:ko01100;path:ko01120;path:ko01220
ACg008163	K07393
ACg006664	K12737
ACg001663	K11771
ACg005439	K09699	path:ko00280;path:ko00640;path:ko01100;path:ko01110;path:ko01130
ACg002725	K06127	path:ko00130;path:ko01100;path:ko01110
ACg003485	K03940	path:ko00190;path:ko01100;path:ko04932;path:ko05010;path:ko05012;path:ko05016
ACg005291	K13110
ACg005966	K14840	path:ko05168
ACg001348	K14789
ACg007809	K12869	path:ko03040
ACg003808	K12893	path:ko03040;path:ko05168
ACg001660	K07976
ACg001079	K07277
ACg000211	K15171
ACg008678	K17497	path:ko00051;path:ko00520;path:ko01100;path:ko01110
ACg006229	K15030
ACg004588	K15541	path:ko03015
ACg003034	K12832	path:ko03040
ACg002157	K10365	path:ko04144
ACg002197	K09539
ACg005339	K04798
ACg003821	K00253	path:ko00280;path:ko01100
ACg000028	K14157	path:ko00310;path:ko01100;path:ko01110;path:ko01130
ACg005495	K02980	path:ko03010
ACg003901	K17435
ACg006701	K12274
ACg003939	K14018	path:ko04141
ACg004860	K17262
ACg005781	K01934	path:ko00670;path:ko01100
ACg007970	K09232
ACg000259	K09051	path:ko04011
ACg002782	K12621	path:ko03018;path:ko03040
ACg001549	K06269	path:ko03015;path:ko04022;path:ko04024;path:ko04113;path:ko04114;path:ko04261;path:ko04270;path:ko04390;path:ko04510;path:ko04611;path:ko04720;path:ko04728;path:ko04750;path:ko04810;path:ko04910;path:ko04921;path:ko04931;path:ko05031;path:ko05034;path:ko05168;path:ko05205
ACg000294	K15202
ACg005504	K12812	path:ko03013;path:ko03015;path:ko03040;path:ko05164
ACg003058	K07127	path:ko00230;path:ko01100;path:ko01120
ACg004967	K17878
ACg004352	K17602
ACg000392	K01591	path:ko00240;path:ko01100
ACg006655	K15334
ACg000236	K01322	path:ko04614
ACg003442	K02990	path:ko03010
ACg006594	K17408
ACg001703	K17780
ACg000493	K14402	path:ko03015
ACg003683	K16066	path:ko00240;path:ko00260;path:ko01100
ACg004554	K15920	path:ko00500;path:ko00520;path:ko01100
ACg000990	K02838
ACg001753	K04794
ACg004294	K06670	path:ko04110;path:ko04111
ACg000596	K00861	path:ko00740;path:ko01100;path:ko01110
ACg006054	K02925	path:ko03010
ACg005972	K02983	path:ko03010
ACg003707	K16803
ACg005945	K08712	path:ko02010
ACg002436	K07178	path:ko03008
ACg007587	K01802
ACg002076	K11306
ACg005811	K02212	path:ko03030;path:ko04110;path:ko04111;path:ko04113
ACg000420	K02963	path:ko03010
ACg001124	K17261
ACg006886	K12667	path:ko00510;path:ko00513;path:ko01100;path:ko04141
ACg003940	K15634	path:ko00010;path:ko00260;path:ko00680;path:ko01100;path:ko01110;path:ko01120;path:ko01130;path:ko01200;path:ko01230
ACg000004	K02739	path:ko03050
ACg006947	K00231	path:ko00860;path:ko01100;path:ko01110
ACg007841	K05544
ACg001582	K03456	path:ko03015;path:ko04071;path:ko04111;path:ko04113;path:ko04114;path:ko04151;path:ko04152;path:ko04261;path:ko04350;path:ko04390;path:ko04391;path:ko04530;path:ko04728;path:ko04730;path:ko05142;path:ko05160
ACg006666	K00943	path:ko00240;path:ko01100
ACg006974	K08513	path:ko04130
ACg008983	K06889
ACg008082	K15176
ACg003971	K09419
ACg002566	K13102
ACg003800	K02219	path:ko04111;path:ko05200;path:ko05222
ACg000755	K04348	path:ko04010;path:ko04020;path:ko04022;path:ko04114;path:ko04310;path:ko04360;path:ko04370;path:ko04380;path:ko04650;path:ko04660;path:ko04662;path:ko04720;path:ko04724;path:ko04728;path:ko04921;path:ko04922;path:ko04924;path:ko05010;path:ko05014;path:ko05031;path:ko05152;path:ko05166
ACg003107	K01092	path:ko00521;path:ko00562;path:ko01100;path:ko04070
ACg003819	K01476	path:ko00220;path:ko00330;path:ko01100;path:ko01110;path:ko01130;path:ko01230;path:ko05146
ACg006968	K18723
ACg008359	K01657	path:ko00400;path:ko01100;path:ko01110;path:ko01130;path:ko01230
ACg005914	K07253	path:ko00350;path:ko00360
ACg002780	K03250	path:ko03013;path:ko05160
ACg006205	K09250
ACg001451	K03955	path:ko00190;path:ko01100;path:ko04932;path:ko05010;path:ko05012;path:ko05016
ACg005368	K01254	path:ko00590;path:ko01100
ACg002916	K00793	path:ko00740;path:ko01100;path:ko01110
ACg000482	K07208	path:ko04072;path:ko04150;path:ko04151;path:ko04152;path:ko04211;path:ko04910;path:ko04919;path:ko05231
ACg004032	K03469	path:ko03030
ACg000868	K14299	path:ko03013
ACg008260	K01443	path:ko00520;path:ko01130
ACg000144	K00772	path:ko00270;path:ko01100
ACg001555	K01823	path:ko00900;path:ko01100;path:ko01110;path:ko01130
ACg000571	K02884	path:ko03010
ACg002620	K11390
ACg007033	K05747	path:ko04062;path:ko04144;path:ko04520;path:ko04666;path:ko04810;path:ko05100;path:ko05130;path:ko05131;path:ko05132;path:ko05231
ACg003839	K00794	path:ko00740;path:ko01100;path:ko01110
ACg000388	K14400	path:ko03015
ACg006525	K03137	path:ko03022;path:ko05169;path:ko05203
ACg008389	K01580	path:ko00250;path:ko00410;path:ko00430;path:ko00650;path:ko01100;path:ko01110;path:ko04727;path:ko04940
ACg007950	K01519	path:ko00230;path:ko00240;path:ko00983;path:ko01100
ACg000548	K02954	path:ko03010
ACg007194	K19487
ACg008372	K03350	path:ko04110;path:ko04111;path:ko04113;path:ko04114;path:ko04120;path:ko04914;path:ko05166
ACg007891	K11648
ACg007641	K00276	path:ko00260;path:ko00350;path:ko00360;path:ko00410;path:ko00950;path:ko00960;path:ko01100;path:ko01110
ACg000643	K01520	path:ko00240;path:ko01100
ACg000610	K17981
ACg001232	K00002	path:ko00010;path:ko00040;path:ko00561;path:ko00930;path:ko01100;path:ko01110;path:ko01120;path:ko01130;path:ko01220
ACg001349	K10579	path:ko04120
ACg004932	K02868	path:ko03010
ACg000975	K18757
ACg002178	K14818
ACg007638	K11135
ACg003320	K02995	path:ko03010
ACg004743	K03134	path:ko03022;path:ko05168
ACg000260	K02883	path:ko03010
ACg005896	K17338
ACg007939	K02871	path:ko03010
ACg001179	K15542	path:ko03015
ACg008289	K05546	path:ko00510;path:ko01100;path:ko04141
ACg002389	K02950	path:ko03010
ACg004558	K02888	path:ko03010
ACg001174	K03120	path:ko03022;path:ko05016;path:ko05166;path:ko05168;path:ko05169;path:ko05203
ACg000948	K03028	path:ko03050;path:ko05169
ACg004427	K17878
ACg006125	K02269	path:ko00190;path:ko01100
ACg006238	K12880	path:ko03013;path:ko03040
ACg004237	K14794
ACg008925	K01897	path:ko00061;path:ko00071;path:ko01100;path:ko01212;path:ko03320;path:ko04146;path:ko04920
ACg003795	K17806
ACg001655	K14843
ACg000718	K10419
ACg003802	K17792
ACg000044	K14213
ACg002823	K14998
ACg004690	K02267	path:ko00190;path:ko01100;path:ko04260;path:ko04932;path:ko05010;path:ko05012;path:ko05016
ACg004220	K01698	path:ko00860;path:ko01100;path:ko01110
ACg007973	K06128	path:ko00564;path:ko05231
ACg008335	K01893	path:ko00970
ACg006689	K17808
ACg001559	K00948	path:ko00030;path:ko00230;path:ko01100;path:ko01110;path:ko01120;path:ko01130;path:ko01200;path:ko01230
ACg008557	K04441	path:ko04010;path:ko04011;path:ko04015;path:ko04068;path:ko04071;path:ko04139;path:ko04212;path:ko04261;path:ko04370;path:ko04380;path:ko04550;path:ko04611;path:ko04620;path:ko04621;path:ko04622;path:ko04660;path:ko04664;path:ko04668;path:ko04670;path:ko04722;path:ko04723;path:ko04728;path:ko04750;path:ko04912;path:ko04914;path:ko04917;path:ko04933;path:ko05014;path:ko05120;path:ko05131;path:ko05…
ACg002750	K08596
ACg004217	K11227	path:ko04011;path:ko04139
ACg001377	K03032	path:ko03050;path:ko05169
ACg001417	K07573	path:ko03018
ACg008237	K00889	path:ko00562;path:ko01100;path:ko04011;path:ko04070;path:ko04072;path:ko04139;path:ko04144;path:ko04666;path:ko04810;path:ko05231
ACg005959	K02915	path:ko03010
ACg003498	K18592	path:ko00430;path:ko00460;path:ko00480;path:ko00590;path:ko01100
ACg004761	K10253
ACg005365	K17279
ACg005375	K01426	path:ko00330;path:ko00360;path:ko00380;path:ko00627;path:ko00643;path:ko01120
ACg006033	K15148
ACg003255	K10908
ACg002602	K03099	path:ko04010;path:ko04012;path:ko04013;path:ko04014;path:ko04062;path:ko04068;path:ko04072;path:ko04151;path:ko04320;path:ko04510;path:ko04540;path:ko04630;path:ko04650;path:ko04660;path:ko04662;path:ko04664;path:ko04722;path:ko04810;path:ko04910;path:ko04912;path:ko04915;path:ko04917;path:ko05034;path:ko05160;path:ko05200;path:ko05205;path:ko05206;path:ko05211;path:ko05213;path:ko05214;path:ko05…
ACg004752	K12617	path:ko03018
ACg001939	K18586
ACg003757	K10842	path:ko03022;path:ko03420
ACg003143	K11130	path:ko03008
ACg006693	K10669
ACg002426	K11226	path:ko04011
ACg001871	K00668	path:ko00061;path:ko01100;path:ko01212
ACg002773	K01480	path:ko00330;path:ko01100
ACg001290	K01410
ACg002068	K03013	path:ko00230;path:ko00240;path:ko01100;path:ko03020;path:ko04623;path:ko05016;path:ko05169
ACg007971	K18162
ACg004899	K17260
ACg000517	K13025	path:ko03013;path:ko03015;path:ko03040
ACg002001	K01647	path:ko00020;path:ko00630;path:ko01100;path:ko01110;path:ko01120;path:ko01130;path:ko01200;path:ko01210;path:ko01230
ACg001265	K01867	path:ko00970
ACg001390	K00681	path:ko00430;path:ko00460;path:ko00480;path:ko01100
ACg005800	K00799	path:ko00480;path:ko00980;path:ko00982;path:ko05204
ACg000237	K02520
ACg006235	K17607
ACg006122	K14766
ACg000099	K07152
ACg004549	K09512
ACg004934	K15292	path:ko04721
ACg005429	K01104
ACg007030	K02735	path:ko03050
ACg001714	K17890	path:ko04140
ACg008213	K01739	path:ko00270;path:ko00450;path:ko00920;path:ko01100;path:ko01110;path:ko01130;path:ko01230
ACg002447	K06693
ACg005421	K11672
ACg004857	K01641	path:ko00072;path:ko00280;path:ko00650;path:ko00900;path:ko01100;path:ko01110;path:ko01130
ACg001826	K02541	path:ko03030;path:ko04110;path:ko04111;path:ko04113
ACg007810	K10573	path:ko04120
ACg005297	K08342	path:ko04140
ACg001848	K18164
ACg001828	K12816	path:ko03040
ACg007272	K00237	path:ko00020;path:ko00190;path:ko01100;path:ko01110;path:ko01120;path:ko01130;path:ko01200;path:ko04932;path:ko05010;path:ko05012;path:ko05016
ACg002273	K01725	path:ko00910
ACg007605	K03593
ACg004887	K01282
ACg006206	K00838	path:ko00130;path:ko00270;path:ko00300;path:ko00350;path:ko00360;path:ko00380;path:ko00400;path:ko00401;path:ko00950;path:ko00960;path:ko01100;path:ko01110;path:ko01130;path:ko01210;path:ko01230
ACg003065	K14848
ACg007409	K11584	path:ko03015;path:ko04071;path:ko04113;path:ko04114;path:ko04151;path:ko04152;path:ko04261;path:ko04728
ACg007170	K00611	path:ko00220;path:ko01100;path:ko01110;path:ko01130;path:ko01230
ACg000844	K02992	path:ko03010
ACg003185	K14191
ACg008103	K01883	path:ko00970
ACg008670	K14801
ACg003750	K12867	path:ko03040
ACg005405	K01358	path:ko04112;path:ko04212
ACg001203	K04393	path:ko04010;path:ko04011;path:ko04014;path:ko04015;path:ko04062;path:ko04144;path:ko04360;path:ko04370;path:ko04510;path:ko04520;path:ko04530;path:ko04660;path:ko04666;path:ko04670;path:ko04722;path:ko04810;path:ko04912;path:ko04932;path:ko04933;path:ko05100;path:ko05120;path:ko05130;path:ko05131;path:ko05132;path:ko05200;path:ko05203;path:ko05205;path:ko05211;path:ko05212
ACg007936	K18716
ACg008318	K15100
ACg002384	K18163
ACg006269	K01102
ACg001463	K04392	path:ko04010;path:ko04014;path:ko04015;path:ko04024;path:ko04062;path:ko04071;path:ko04145;path:ko04151;path:ko04310;path:ko04360;path:ko04370;path:ko04380;path:ko04510;path:ko04520;path:ko04620;path:ko04650;path:ko04662;path:ko04664;path:ko04666;path:ko04670;path:ko04722;path:ko04810;path:ko04932;path:ko04933;path:ko04972;path:ko05014;path:ko05100;path:ko05120;path:ko05131;path:ko05132;path:ko05…
ACg006162	K12193	path:ko04144
ACg001769	K12861	path:ko03040
ACg003686	K15303	path:ko00980
ACg003787	K01889	path:ko00970
ACg004084	K01187	path:ko00052;path:ko00500;path:ko01100
ACg000612	K12619	path:ko03008;path:ko03018
ACg004389	K09550
ACg008688	K17794	path:ko04212
ACg000589	K00799	path:ko00480;path:ko00980;path:ko00982;path:ko05204
ACg003834	K16794	path:ko00565;path:ko01100
ACg008108	K03122	path:ko03022;path:ko05203
ACg001616	K01061	path:ko00361;path:ko00364;path:ko00623;path:ko01100;path:ko01110;path:ko01120;path:ko01130
ACg007265	K04797
ACg000402	K06867
ACg005160	K00101	path:ko00620;path:ko01100
ACg006281	K09549
ACg005876	K17787
ACg002419	K11121	path:ko00760;path:ko01100;path:ko04213
ACg003142	K00698	path:ko00520
ACg007935	K01183	path:ko00520;path:ko01100
ACg000941	K11322
ACg004435	K09537
ACg002041	K03236	path:ko03013
ACg003648	K13719	path:ko04141
ACg002130	K02218	path:ko04011
ACg000186	K11808	path:ko00230;path:ko01100;path:ko01110
ACg001743	K01011	path:ko00270;path:ko00920;path:ko01100;path:ko01120;path:ko04122
ACg007237	K15448
ACg006581	K02858	path:ko00740;path:ko01100;path:ko01110
ACg008742	K14570	path:ko03008
ACg000064	K06867
ACg003125	K11566
ACg007872	K02377	path:ko00051;path:ko00520;path:ko01100
ACg002103	K01673	path:ko00910
ACg006014	K01514	path:ko00230
ACg001641	K14773
ACg001915	K01279	path:ko04142
ACg002698	K18065
ACg004203	K01483	path:ko00230;path:ko01100
ACg007224	K15203
ACg004759	K12828	path:ko03040
ACg002989	K02863	path:ko03010
ACg006979	K15029
ACg004935	K00624	path:ko04146
ACg007710	K01835	path:ko00010;path:ko00030;path:ko00052;path:ko00230;path:ko00500;path:ko00520;path:ko00521;path:ko01100;path:ko01110;path:ko01120;path:ko01130
ACg003516	K10592	path:ko04120
ACg001452	K02872	path:ko03010
ACg006093	K12873	path:ko03040
ACg002850	K08853
ACg004353	K17918	path:ko04144
ACg008142	K14799
ACg004304	K15731
ACg007425	K12858	path:ko03040
ACg000631	K03133	path:ko03022;path:ko05168
ACg005814	K13280	path:ko03060
ACg003506	K01379	path:ko04071;path:ko04142;path:ko04210;path:ko05152
ACg005962	K02910	path:ko03010
ACg005189	K15918	path:ko00260;path:ko00561;path:ko00630;path:ko01100;path:ko01110;path:ko01130;path:ko01200
ACg005812	K03979
ACg004166	K03011	path:ko00230;path:ko00240;path:ko01100;path:ko03020;path:ko05016;path:ko05169
ACg003131	K14537	path:ko03008
ACg004964	K11578
ACg004039	K13128
ACg001880	K00108	path:ko00260;path:ko01100
ACg001150	K10643	path:ko03018
ACg000649	K15601
ACg002716	K17769
ACg000723	K01466	path:ko00230;path:ko01100;path:ko01120
ACg002646	K09467
ACg001464	K15634	path:ko00010;path:ko00260;path:ko00680;path:ko01100;path:ko01110;path:ko01120;path:ko01130;path:ko01200;path:ko01230
ACg004904	K00868	path:ko00750;path:ko01100
ACg004842	K12189	path:ko04144
ACg002917	K10356
ACg007126	K03539	path:ko03008;path:ko03013
ACg002639	K13211
ACg003881	K01885	path:ko00860;path:ko00970;path:ko01100;path:ko01110
ACg001429	K12839	path:ko03040
ACg001291	K13120
ACg002025	K18339	path:ko00051;path:ko01120
ACg000302	K15544	path:ko03015
ACg005295	K12663	path:ko04146
ACg002549	K11253	path:ko05034;path:ko05202;path:ko05322
ACg001948	K10881	path:ko03050;path:ko03440;path:ko05169
ACg003175	K11338
ACg000657	K00380	path:ko00920;path:ko01100;path:ko01120
ACg002069	K14962	path:ko03015
ACg000385	K02355
ACg007387	K14300	path:ko03013
ACg006151	K12178
ACg007738	K19029	path:ko00051;path:ko04152;path:ko04919
ACg002747	K10684	path:ko04120
ACg002933	K11982
ACg000703	K01267
ACg002172	K19347
ACg004443	K09579
ACg003570	K11304	path:ko05166
ACg005594	K14575	path:ko03008
ACg002489	K03131	path:ko03022;path:ko05168
ACg003575	K18670
ACg004548	K14829
ACg004006	K18182
ACg008456	K17662
ACg003236	K15110
ACg005560	K12373	path:ko00511;path:ko00520;path:ko00531;path:ko00603;path:ko00604;path:ko01100;path:ko04142
ACg000991	K15114
ACg005467	K11756
ACg003732	K07874	path:ko05134
ACg005382	K02885	path:ko03010
ACg003213	K03039	path:ko03050;path:ko05169
ACg004007	K03037	path:ko03050;path:ko05169
ACg001087	K12584	path:ko03018
ACg008541	K07562	path:ko03008;path:ko03013
ACg003654	K02898	path:ko03010
ACg005321	K00757	path:ko00240;path:ko00983;path:ko01100
ACg003675	K17508
ACg007143	K17871
ACg001201	K11592	path:ko05206
ACg003650	K03132	path:ko03022
ACg001274	K00915	path:ko00562;path:ko01100;path:ko04070
ACg001318	K03424
ACg004604	K02921	path:ko03010
ACg008663	K04646	path:ko04142;path:ko04144;path:ko04721;path:ko04961;path:ko05016;path:ko05100
ACg005880	K10751
ACg008873	K18626
ACg005369	K12486	path:ko04144
ACg002981	K17292
ACg004694	K11996	path:ko04122
ACg007329	K17973
ACg002651	K01178	path:ko00500;path:ko01100
ACg004142	K11236	path:ko04011
ACg000083	K19691	path:ko02020
ACg005458	K14553	path:ko03008
ACg006963	K09481	path:ko03060;path:ko04141;path:ko04145;path:ko05110
ACg002721	K00799	path:ko00480;path:ko00980;path:ko00982;path:ko05204
ACg009042	K18168
ACg005422	K07901	path:ko04144;path:ko04152;path:ko04972
ACg007430	K08486	path:ko04130;path:ko04721
ACg007169	K00693	path:ko00500;path:ko04151;path:ko04152;path:ko04910;path:ko04922;path:ko04931
ACg001610	K15206
ACg007379	K07432	path:ko00510;path:ko00513;path:ko01100
ACg000584	K03257	path:ko03013
ACg000526	K12198	path:ko04144
ACg008417	K17541
ACg001470	K07605
ACg003060	K12757	path:ko04510;path:ko04530;path:ko04611;path:ko04670;path:ko04810
ACg001709	K11675
ACg001213	K11303	path:ko05034
ACg002881	K12878	path:ko03013;path:ko03040
ACg006358	K00416	path:ko00190;path:ko01100;path:ko04260;path:ko04932;path:ko05010;path:ko05012;path:ko05016
ACg002153	K14713
ACg005455	K01885	path:ko00860;path:ko00970;path:ko01100;path:ko01110
ACg007447	K15424
ACg002580	K08254
ACg002382	K13726
ACg003100	K01875	path:ko00970
ACg001782	K15128
ACg005555	K12373	path:ko00511;path:ko00520;path:ko00531;path:ko00603;path:ko00604;path:ko01100;path:ko04142
ACg005243	K19386
ACg007966	K12608	path:ko03018
ACg005431	K12815	path:ko03040
ACg004980	K01918	path:ko00410;path:ko00770;path:ko01100;path:ko01110
ACg003474	K06276	path:ko03320;path:ko04011;path:ko04068;path:ko04071;path:ko04150;path:ko04151;path:ko04152;path:ko04210;path:ko04510;path:ko04660;path:ko04664;path:ko04722;path:ko04910;path:ko04919;path:ko04931;path:ko04960;path:ko05145;path:ko05160;path:ko05205;path:ko05213;path:ko05215;path:ko05223;path:ko05231
ACg004403	K00898
ACg006088	K09008
ACg007566	K08516	path:ko04130
ACg005573	K04513	path:ko04011;path:ko04014;path:ko04015;path:ko04022;path:ko04024;path:ko04062;path:ko04071;path:ko04072;path:ko04144;path:ko04270;path:ko04310;path:ko04350;path:ko04360;path:ko04510;path:ko04520;path:ko04530;path:ko04611;path:ko04660;path:ko04670;path:ko04722;path:ko04810;path:ko04921;path:ko04972;path:ko05100;path:ko05130;path:ko05133;path:ko05152;path:ko05200;path:ko05203;path:ko05205;path:ko05…
ACg003066	K06698	path:ko03050;path:ko04612;path:ko05160
ACg007342	K03106	path:ko03060;path:ko03070
ACg002572	K11364
ACg004698	K09566
ACg004146	K15267
ACg008415	K00020	path:ko00280;path:ko01100
ACg004681	K13104
ACg003928	K00987
ACg003662	K19306
ACg007022	K01469	path:ko00480
ACg008086	K15109
ACg004222	K05755	path:ko04144;path:ko04666;path:ko04810;path:ko05100;path:ko05130;path:ko05131;path:ko05132
ACg004914	K11839	path:ko04144
ACg003622	K01304
ACg007689	K10389
ACg001281	K08832
ACg001811	K10847	path:ko03420
ACg001932	K14265	path:ko00380;path:ko01100
ACg006916	K14297	path:ko03013;path:ko05164
ACg007728	K13116
ACg000490	K01886	path:ko00970;path:ko01100
ACg002574	K03506	path:ko00230;path:ko00240;path:ko01100;path:ko03030;path:ko03410;path:ko03420;path:ko05166
ACg007398	K03127	path:ko03022;path:ko05168
ACg001366	K11229	path:ko04011;path:ko04139
ACg003870	K14399	path:ko03015
ACg000635	K14416	path:ko03015;path:ko05134
ACg006415	K17822
ACg008270	K00252	path:ko00071;path:ko00310;path:ko00362;path:ko00380;path:ko01100;path:ko01120;path:ko01130
ACg004277	K17795
ACg001910	K19245
ACg002986	K00921	path:ko00562;path:ko04070;path:ko04145;path:ko04810
ACg008029	K12602	path:ko03018
ACg001941	K06997
ACg000551	K16578
ACg000929	K12236
ACg009255	K00938	path:ko00900;path:ko01100;path:ko01110;path:ko01130
ACg007984	K01626	path:ko00400;path:ko01100;path:ko01110;path:ko01130;path:ko01230
ACg003226	K12190	path:ko04144
ACg000523	K00641	path:ko00270;path:ko01100;path:ko01130
ACg001522	K04706	path:ko04120;path:ko04630;path:ko05160
ACg004243	K13342	path:ko04146
ACg003081	K01522	path:ko00230;path:ko05222;path:ko05223
ACg002584	K13172
ACg001457	K14404	path:ko03015;path:ko05164
ACg003370	K08496	path:ko04130
ACg007195	K03135	path:ko03022
ACg005622	K02732	path:ko03050
ACg000286	K14790
ACg005377	K03006	path:ko00230;path:ko00240;path:ko01100;path:ko03020;path:ko05016;path:ko05168;path:ko05169
ACg001794	K02151	path:ko00190;path:ko01100;path:ko04145;path:ko04721;path:ko04966;path:ko05110;path:ko05120;path:ko05323
ACg008676	K14782
ACg000139	K09523	path:ko04141;path:ko05164
ACg002494	K14803
ACg004750	K01196	path:ko00500;path:ko01100
ACg001380	K01783	path:ko00030;path:ko00040;path:ko00710;path:ko01100;path:ko01110;path:ko01120;path:ko01130;path:ko01200;path:ko01230
ACg002885	K03014	path:ko00230;path:ko00240;path:ko01100;path:ko03020;path:ko04623;path:ko05016;path:ko05169
ACg000683	K14264	path:ko00380;path:ko01100
ACg007131	K13337	path:ko04146
ACg004684	K11600	path:ko03018
ACg003869	K03885	path:ko00190
ACg001943	K09503	path:ko04141
ACg006487	K04555	path:ko04120;path:ko04141;path:ko05012
ACg004457	K10773	path:ko03410
ACg003005	K07889	path:ko04014;path:ko04144;path:ko04145;path:ko04962;path:ko05146;path:ko05152
ACg001908	K01426	path:ko00330;path:ko00360;path:ko00380;path:ko00627;path:ko00643;path:ko01120
ACg007863	K10865	path:ko03440;path:ko03450
ACg004572	K04354	path:ko03015;path:ko04071;path:ko04111;path:ko04151;path:ko04152;path:ko04261;path:ko04390;path:ko04391;path:ko04530;path:ko04728;path:ko05142;path:ko05160
ACg003969	K18173
ACg005982	K14863
ACg004898	K11380
ACg008135	K00851	path:ko00030;path:ko01100;path:ko01110;path:ko01120;path:ko01130;path:ko01200
ACg001952	K00925	path:ko00430;path:ko00620;path:ko00640;path:ko00680;path:ko00720;path:ko01100;path:ko01120;path:ko01200
ACg006144	K08286
ACg006249	K03249	path:ko03013
ACg004901	K03022	path:ko00230;path:ko00240;path:ko01100;path:ko03020;path:ko04623;path:ko05169
ACg008070	K04567	path:ko00970
ACg003251	K15100
ACg002152	K07766
ACg000563	K14824
ACg004946	K12834	path:ko03040
ACg002282	K07827	path:ko04010;path:ko04012;path:ko04013;path:ko04014;path:ko04015;path:ko04062;path:ko04068;path:ko04071;path:ko04072;path:ko04151;path:ko04210;path:ko04211;path:ko04213;path:ko04320;path:ko04360;path:ko04370;path:ko04530;path:ko04540;path:ko04550;path:ko04650;path:ko04660;path:ko04662;path:ko04664;path:ko04720;path:ko04722;path:ko04725;path:ko04726;path:ko04730;path:ko04810;path:ko04910;path:ko04…
ACg000944	K03123	path:ko03022;path:ko05203
ACg009099	K07443
ACg001849	K03264	path:ko03008
ACg004161	K08489	path:ko04130
ACg000784	K11293
ACg001186	K12670	path:ko00510;path:ko00513;path:ko01100;path:ko04141
ACg002057	K10843	path:ko03022;path:ko03420
ACg008343	K13985	path:ko04723
ACg001239	K11404	path:ko04919;path:ko05034;path:ko05203
ACg004719	K03115	path:ko03008;path:ko04064;path:ko04139;path:ko04310;path:ko04520;path:ko04530;path:ko04712;path:ko05162;path:ko05168;path:ko05169
ACg001031	K00784	path:ko03013
ACg006096	K13509	path:ko00561;path:ko00564;path:ko01100;path:ko01110;path:ko04072;path:ko04975
ACg007263	K08139	path:ko04113
ACg008222	K14006	path:ko04141
ACg001184	K02260	path:ko00190;path:ko01100
ACg007437	K14835
ACg008356	K10755	path:ko03030;path:ko03420;path:ko03430
ACg003345	K08876
ACg002190	K09528
ACg005684	K08488	path:ko04130;path:ko04145
ACg002985	K14798
ACg006897	K05236
ACg006554	K17783
ACg005396	K10885	path:ko03450
ACg008864	K18551	path:ko00760
ACg000267	K14961
ACg000813	K00928	path:ko00260;path:ko00261;path:ko00270;path:ko00300;path:ko01100;path:ko01110;path:ko01120;path:ko01130;path:ko01210;path:ko01230
ACg001485	K10581	path:ko04120
ACg000327	K01599	path:ko00860;path:ko01100;path:ko01110
ACg004201	K04460	path:ko04010
ACg006270	K11855
ACg003101	K10755	path:ko03030;path:ko03420;path:ko03430
ACg001236	K10253
ACg001095	K06134	path:ko00130;path:ko01100;path:ko01110
ACg003467	K05610
ACg001930	K07359	path:ko04152;path:ko04211;path:ko04920;path:ko04921;path:ko05034
ACg008313	K01512	path:ko00620;path:ko00627;path:ko01120
ACg002595	K03506	path:ko00230;path:ko00240;path:ko01100;path:ko03030;path:ko03410;path:ko03420;path:ko05166
ACg003923	K01915	path:ko00220;path:ko00250;path:ko00630;path:ko00910;path:ko01100;path:ko01120;path:ko01230;path:ko02020;path:ko04724;path:ko04727
ACg000039	K17278
ACg004730	K17969	path:ko04139
ACg007912	K12735
ACg003508	K13093
ACg001268	K17675
ACg007975	K17491	path:ko04212;path:ko04922
ACg004306	K03004	path:ko00230;path:ko00240;path:ko01100;path:ko03020
ACg003047	K11246	path:ko04011
ACg001643	K14963
ACg000200	K09540	path:ko03060;path:ko04141
ACg001241	K11315
ACg008123	K03959	path:ko00190;path:ko01100;path:ko04932;path:ko05010;path:ko05012;path:ko05016
ACg001889	K18587
ACg002557	K14564	path:ko03008
ACg001162	K15192
ACg003280	K11650
ACg002508	K14837
ACg002921	K03256
ACg000611	K03680	path:ko03013
ACg003754	K01764	path:ko00860
ACg004771	K10994
ACg002621	K14823
ACg003877	K00838	path:ko00130;path:ko00270;path:ko00300;path:ko00350;path:ko00360;path:ko00380;path:ko00400;path:ko00401;path:ko00950;path:ko00960;path:ko01100;path:ko01110;path:ko01130;path:ko01210;path:ko01230
ACg008198	K16055	path:ko00500;path:ko01100
ACg008075	K01738	path:ko00270;path:ko00920;path:ko01100;path:ko01110;path:ko01120;path:ko01130;path:ko01200;path:ko01230
ACg002539	K15326
ACg000614	K08517	path:ko04130;path:ko04145;path:ko05134
ACg006519	K01338	path:ko04112
ACg000430	K09234	path:ko05202
ACg004947	K10590	path:ko04120
ACg002581	K02146	path:ko00190;path:ko01100;path:ko04142;path:ko04145;path:ko04721;path:ko04966;path:ko05110;path:ko05120;path:ko05152;path:ko05203;path:ko05323
ACg008315	K11681
ACg003053	K03671
ACg003585	K11434	path:ko04068;path:ko04922
ACg007407	K12669	path:ko00510;path:ko00513;path:ko01100;path:ko04141
ACg002457	K10597	path:ko04120;path:ko04141
ACg007378	K00286	path:ko00330;path:ko01100;path:ko01110;path:ko01130;path:ko01230
ACg004574	K09518	path:ko04141
ACg008868	K00721	path:ko00510;path:ko01100
ACg006154	K11321
ACg003012	K09548
ACg007155	K16569
ACg006362	K19691	path:ko02020
ACg006273	K12492	path:ko04144
ACg006066	K06664	path:ko04146
ACg003616	K11407	path:ko05034;path:ko05203
ACg005503	K14779
ACg000675	K18719
ACg007035	K17576
ACg003317	K03348	path:ko04110;path:ko04111;path:ko04113;path:ko04114;path:ko04120;path:ko04914;path:ko05166
ACg005958	K01101	path:ko00627;path:ko01120
ACg007222	K02427
ACg001659	K03016	path:ko00230;path:ko00240;path:ko01100;path:ko03020;path:ko04623;path:ko05016;path:ko05169
ACg006529	K07047
ACg002637	K14319	path:ko03013
ACg004749	K11365
ACg001035	K11426
ACg001101	K13721
ACg006175	K11495
ACg008900	K17866
ACg007021	K11979
ACg001156	K14765
ACg001116	K15323
ACg002731	K01115	path:ko00564;path:ko00565;path:ko01100;path:ko01110;path:ko04014;path:ko04024;path:ko04071;path:ko04072;path:ko04144;path:ko04666;path:ko04724;path:ko04912;path:ko05231
ACg003626	K03252	path:ko03013
ACg005394	K14309	path:ko03013
ACg000109	K06947
ACg005294	K17678
ACg006498	K09602
ACg004359	K01759	path:ko00620
ACg005514	K08764	path:ko00120;path:ko01100;path:ko03320;path:ko04146
ACg004122	K01611	path:ko00270;path:ko00330;path:ko01100
ACg004649	K06287
ACg002227	K09403
ACg005552	K01046	path:ko00561;path:ko01100
ACg002846	K12818	path:ko03040
ACg006552	K15443
ACg002124	K06867
ACg000331	K02272	path:ko00190;path:ko01100;path:ko04260;path:ko04932;path:ko05010;path:ko05012;path:ko05016
ACg008482	K01094	path:ko00564;path:ko01100
ACg001558	K12613	path:ko03018
ACg006954	K00065	path:ko00040
ACg004444	K06174
ACg007563	K10352	path:ko04530
ACg004760	K18633
ACg008390	K18187
ACg003919	K12272	path:ko03060
ACg009247	K12854	path:ko03040
ACg002815	K17919	path:ko04144
ACg003761	K11497
ACg003963	K01341
ACg005169	K18203
ACg003621	K07478
ACg000295	K02905	path:ko03010
ACg007348	K16219
ACg004692	K09506
ACg005381	K08286
ACg007558	K03872	path:ko04066;path:ko04120;path:ko05200;path:ko05211
ACg003564	K06062	path:ko04330;path:ko04919;path:ko05166;path:ko05203
ACg002951	K08495	path:ko04130
ACg006705	K11361
ACg002699	K18184
ACg003436	K14327	path:ko03013;path:ko03015
ACg005891	K01426	path:ko00330;path:ko00360;path:ko00380;path:ko00627;path:ko00643;path:ko01120
ACg007861	K09522
ACg003152	K04648	path:ko04962;path:ko05016
ACg001238	K00948	path:ko00030;path:ko00230;path:ko01100;path:ko01110;path:ko01120;path:ko01130;path:ko01200;path:ko01230
ACg007393	K12587	path:ko03018
ACg005487	K08794	path:ko04921;path:ko04925
ACg000640	K17412
ACg006089	K11324
ACg003959	K00297	path:ko00670;path:ko00720;path:ko01100;path:ko01120;path:ko01200
ACg004008	K03036	path:ko03050;path:ko05169
ACg007568	K11987	path:ko00590;path:ko01100;path:ko04064;path:ko04370;path:ko04668;path:ko04723;path:ko04726;path:ko04913;path:ko04921;path:ko04923;path:ko05140;path:ko05200;path:ko05204;path:ko05206;path:ko05222
ACg007664	K02326	path:ko00230;path:ko00240;path:ko01100;path:ko03030;path:ko03410;path:ko03420;path:ko05166
ACg006079	K03544	path:ko04112
ACg004508	K11770
ACg002141	K05917	path:ko00100;path:ko01100;path:ko01110;path:ko01130
ACg003026	K14758	path:ko03008
ACg000234	K15441
ACg006319	K01613	path:ko00564;path:ko01100;path:ko01110
ACg006107	K02434	path:ko00970;path:ko01100
ACg000080	K14301	path:ko03013
ACg002908	K14763
ACg002368	K15115
ACg003600	K12836	path:ko03040;path:ko05131
ACg003579	K09313
ACg004666	K00652	path:ko00780;path:ko01100
ACg000721	K18467	path:ko04144
ACg004688	K05758	path:ko04144;path:ko04666;path:ko04810;path:ko05100;path:ko05130;path:ko05131;path:ko05132
ACg000897	K05687	path:ko05012
ACg005500	K08332	path:ko04140
ACg003418	K07047
ACg008435	K14290	path:ko03008;path:ko03013;path:ko05164;path:ko05166;path:ko05169
ACg004174	K03235
ACg005539	K08967	path:ko00270;path:ko01100
ACg003986	K07739
ACg001821	K15204
ACg003249	K01719	path:ko00860;path:ko01100;path:ko01110
ACg000094	K09140
ACg004195	K11367
ACg000737	K14401	path:ko03015
ACg005547	K00787	path:ko00900;path:ko01100;path:ko01110;path:ko01130;path:ko05164;path:ko05166
ACg006679	K14855
ACg007421	K00486	path:ko00380;path:ko01100
ACg003133	K02956	path:ko03010
ACg002370	K07748	path:ko00100;path:ko01100;path:ko01130
ACg000458	K18442	path:ko04144
ACg003172	K02997	path:ko03010
ACg006820	K18192
ACg004603	K00568	path:ko00130;path:ko01100;path:ko01110
ACg005936	K00698	path:ko00520
ACg001422	K11375
ACg005640	K11436
ACg006027	K01814	path:ko00340;path:ko01100;path:ko01110;path:ko01230
ACg004254	K00988	path:ko00230
ACg001108	K00565	path:ko03015
ACg008028	K12602	path:ko03018
ACg005205	K13288	path:ko03008
ACg000239	K12882	path:ko03013;path:ko03015;path:ko03040
ACg001102	K10591	path:ko04011;path:ko04120;path:ko04144;path:ko05169
ACg001416	K16738
ACg005183	K00799	path:ko00480;path:ko00980;path:ko00982;path:ko05204
ACg000550	K08286
ACg002991	K12847	path:ko03040
ACg001779	K02209	path:ko03030;path:ko04110;path:ko04111;path:ko04113
ACg005584	K04459	path:ko04010
ACg003492	K12848	path:ko03040
ACg004059	K14847
ACg002618	K02321	path:ko00230;path:ko00240;path:ko01100;path:ko03030
ACg005509	K14546	path:ko03008
ACg003520	K08339	path:ko04140;path:ko04211;path:ko04213;path:ko04622;path:ko05131
ACg008382	K08341	path:ko04068;path:ko04139;path:ko04140;path:ko04212;path:ko04727
ACg001866	K05663	path:ko02010
ACg001694	K11665
ACg002062	K11663
ACg005970	K13941	path:ko00790;path:ko01100
ACg000471	K06685	path:ko04111;path:ko04390;path:ko04391
ACg003653	K13122
ACg006912	K19030	path:ko00051;path:ko04152
ACg007158	K14022	path:ko04141
ACg003656	K13119
ACg003124	K05543
ACg003217	K07512	path:ko00062;path:ko01100;path:ko01212
ACg006762	K17438
ACg002712	K12581	path:ko03018
ACg000793	K00272	path:ko00250;path:ko04146
ACg001325	K06111	path:ko04530
ACg003791	K11108	path:ko03008
ACg003325	K15711
ACg005340	K08493	path:ko04130
ACg001723	K07407	path:ko00052;path:ko00561;path:ko00600;path:ko00603
ACg006454	K03005	path:ko00230;path:ko00240;path:ko01100;path:ko03020
ACg000492	K07937	path:ko04072;path:ko04144;path:ko05110;path:ko05134
ACg007626	K05954	path:ko00900;path:ko01130
ACg002973	K14407	path:ko03015
ACg004740	K03026	path:ko00230;path:ko00240;path:ko01100;path:ko03020;path:ko04623;path:ko05169
ACg005483	K00226	path:ko00240;path:ko01100
ACg003907	K00671
ACg006233	K03124	path:ko03022;path:ko05169;path:ko05203
ACg005400	K01551
ACg007968	K03002	path:ko00230;path:ko00240;path:ko01100;path:ko03020
ACg008132	K03540	path:ko03013
ACg003488	K14557	path:ko03008
ACg003577	K03141	path:ko03022;path:ko03420;path:ko05203
ACg007708	K01974
ACg003898	K11841	path:ko04139
ACg005367	K03000	path:ko00230;path:ko00240;path:ko01100;path:ko03020
ACg004434	K18334	path:ko00051;path:ko01120
ACg005330	K12625	path:ko03018;path:ko03040
ACg006977	K14573	path:ko03008
ACg004742	K15113
ACg006197	K11446
ACg007707	K16536
ACg005866	K13281
ACg007785	K07107
ACg006179	K14570	path:ko03008
ACg006570	K15174	path:ko04011
ACg008890	K01750	path:ko00330;path:ko01110;path:ko01130;path:ko01230
ACg008708	K01758	path:ko00260;path:ko00270;path:ko00450;path:ko01100;path:ko01130;path:ko01230
ACg005290	K10798	path:ko03410;path:ko04210;path:ko04212
ACg002059	K03648	path:ko03410;path:ko05340
ACg008567	K12761	path:ko04113
ACg003769	K07407	path:ko00052;path:ko00561;path:ko00600;path:ko00603
ACg004870	K02433	path:ko00970;path:ko01100
ACg007446	K19476	path:ko04144
ACg004058	K18328
ACg000664	K09506
ACg006379	K07117
ACg002657	K14815
ACg007336	K17906
ACg003090	K01480	path:ko00330;path:ko01100
ACg008564	K05542
ACg000328	K06639	path:ko04110;path:ko04111;path:ko04113
ACg004680	K02257	path:ko00190;path:ko00860;path:ko01100;path:ko01110
ACg007616	K02835
ACg005342	K17263
ACg002432	K10866	path:ko03440;path:ko03450
ACg003372	K14851
ACg003089	K11801
ACg000469	K14778
ACg004659	K14430
ACg001778	K12179
ACg007100	K14768
ACg006152	K00916
ACg008476	K00606	path:ko00770;path:ko01100;path:ko01110
ACg008706	K12177
ACg000045	K12589	path:ko03018
ACg009093	K03424
ACg007926	K03253	path:ko03013
ACg003625	K03241	path:ko03013
ACg000343	K00759	path:ko00230;path:ko01100
ACg007610	K14544	path:ko03008
ACg008481	K02021
ACg004569	K14846
ACg000691	K06944
ACg007477	K11397
ACg006436	K14550	path:ko03008
ACg006083	K00784	path:ko03013
ACg002785	K05727
ACg002724	K03347	path:ko04110;path:ko04111;path:ko04114;path:ko04120;path:ko04141;path:ko04310;path:ko04350;path:ko04710;path:ko05168
ACg002843	K12396	path:ko04142
ACg004610	K06676	path:ko04111
ACg002826	K15198
ACg006648	K00505	path:ko00350;path:ko00740;path:ko00950;path:ko00965;path:ko01100;path:ko01110;path:ko04916
ACg003889	K09250
ACg003342	K01074	path:ko00062;path:ko01100;path:ko01212;path:ko04142
ACg001547	K00287	path:ko00670;path:ko00790;path:ko01100
ACg003720	K14841
ACg000887	K19703
ACg000433	K12824	path:ko03040;path:ko04212
ACg000009	K12877	path:ko03013;path:ko03015;path:ko03040
ACg002158	K04640
ACg000834	K08073
ACg002748	K01930	path:ko00790;path:ko01100
ACg007972	K15445
ACg001596	K02877	path:ko03010
ACg002928	K13289	path:ko04142;path:ko04614
ACg001820	K11230	path:ko02020;path:ko04011
ACg000025	K16302
ACg007658	K15455
ACg007934	K01754	path:ko00260;path:ko00290;path:ko01100;path:ko01110;path:ko01130;path:ko01200;path:ko01230
ACg006667	K02922	path:ko03010
ACg001702	K11675
ACg002723	K11309
ACg003319	K11429	path:ko00310
ACg000648	K11233	path:ko02020;path:ko04011;path:ko04139
ACg005210	K00306	path:ko00260;path:ko00310;path:ko01100;path:ko04146
ACg000801	K02929	path:ko03010
ACg002623	K02913	path:ko03010
ACg003417	K10601	path:ko04120;path:ko04141
ACg006002	K08337	path:ko04140
ACg007745	K10276
ACg003930	K01487	path:ko00230;path:ko01100
ACg000427	K02890	path:ko03010
ACg000352	K00700	path:ko00500;path:ko01100;path:ko01110
ACg007101	K11667
ACg001068	K17878
ACg002590	K12813	path:ko03040
ACg003033	K12592	path:ko03018
ACg003623	K00860	path:ko00230;path:ko00920;path:ko01100;path:ko01120
ACg007698	K12472	path:ko04144
ACg006252	K18798
ACg001462	K14812
ACg000689	K09648	path:ko03060
ACg002932	K01381
ACg000362	K09175	path:ko04111
ACg004667	K03537	path:ko03008;path:ko03013
ACg002987	K12176
ACg004358	K01759	path:ko00620
ACg008036	K01768	path:ko00230;path:ko04113;path:ko04213
ACg007405	K17943
ACg003187	K12879	path:ko03013;path:ko03040
ACg001305	K00077	path:ko00770;path:ko01100;path:ko01110
ACg005933	K03868	path:ko03420;path:ko04066;path:ko04110;path:ko04111;path:ko04114;path:ko04120;path:ko04141;path:ko04310;path:ko04350;path:ko04710;path:ko05200;path:ko05211
ACg004147	K11274
ACg003007	K19476	path:ko04144
ACg008124	K03163
ACg003227	K11215	path:ko04011
ACg002360	K14663
ACg000891	K09531
ACg000466	K11095	path:ko03040
ACg003221	K14787
ACg000108	K14800
ACg003569	K14806
ACg002687	K09272
ACg004525	K08960	path:ko04068;path:ko04310;path:ko04340;path:ko04390;path:ko04391;path:ko04710;path:ko04711
ACg007915	K11870
ACg000825	K00049	path:ko00260;path:ko00620;path:ko00630;path:ko01100;path:ko01110;path:ko01120
ACg004573	K02269	path:ko00190;path:ko01100
ACg006611	K00147	path:ko00330;path:ko00332;path:ko01100;path:ko01110;path:ko01130;path:ko01230
ACg007704	K12604	path:ko03018
ACg006952	K00008	path:ko00040;path:ko00051;path:ko01100
ACg003742	K13431	path:ko03060
ACg003300	K04640
ACg005854	K15178
ACg007248	K15361	path:ko03460
ACg006520	K14293	path:ko03013
ACg006245	K02542	path:ko03030;path:ko04110;path:ko04111;path:ko04113
ACg002492	K01560	path:ko00361;path:ko00625;path:ko01100;path:ko01120
ACg002718	K14767
ACg003860	K17600
ACg003644	K03177
ACg000003	K17508
ACg006204	K18588
ACg004831	K08504	path:ko04130
ACg007388	K04718	path:ko00600;path:ko01100;path:ko04020;path:ko04071;path:ko04370;path:ko04666;path:ko05152
ACg006485	K10575	path:ko04120;path:ko04141;path:ko05012
ACg000363	K06018
ACg006681	K14963
ACg007144	K13830	path:ko00400;path:ko01100;path:ko01110;path:ko01130;path:ko01230
ACg008413	K15053	path:ko04144
ACg000407	K07561
ACg003609	K14842
ACg007868	K00953	path:ko00740;path:ko01100;path:ko01110
ACg002779	K09660
ACg008363	K05853	path:ko04020;path:ko04022;path:ko04972;path:ko05010
ACg000745	K14679
ACg007948	K12586	path:ko03018
ACg006336	K17972
ACg004866	K17053
ACg008259	K06210	path:ko00760;path:ko01100
ACg005229	K18327
ACg006650	K14304	path:ko03013
ACg003604	K14439	path:ko04550
ACg000403	K06927
ACg005620	K00765	path:ko00340;path:ko01100;path:ko01110;path:ko01230
ACg000278	K14303	path:ko03013
ACg000022	K01873	path:ko00970
ACg001149	K10627
ACg000164	K08681	path:ko00750
ACg001525	K03635	path:ko00790;path:ko01100;path:ko04122
ACg006124	K11341
ACg005286	K14802
ACg002922	K17887
ACg006618	K14810
ACg002137	K08856
ACg006063	K01930	path:ko00790;path:ko01100
ACg002540	K15111
ACg001347	K08490	path:ko04130
ACg003346	K11567
ACg001438	K15147
ACg007596	K00799	path:ko00480;path:ko00980;path:ko00982;path:ko05204
ACg001381	K11806
ACg003886	K14165
ACg004963	K10756	path:ko03030;path:ko03420;path:ko03430
ACg005134	K15463
ACg009077	K00276	path:ko00260;path:ko00350;path:ko00360;path:ko00410;path:ko00950;path:ko00960;path:ko01100;path:ko01110
ACg002053	K16186	path:ko04150
ACg007249	K14538	path:ko03008
ACg001207	K07905	path:ko04144;path:ko04152;path:ko04962
ACg006590	K14821
ACg004616	K10632	path:ko04014
ACg004065	K05349	path:ko00460;path:ko00500;path:ko00940;path:ko01100;path:ko01110
ACg006925	K12188	path:ko04144
ACg001137	K10765
ACg007472	K08266	path:ko04150;path:ko04151
ACg009038	K06269	path:ko03015;path:ko04022;path:ko04024;path:ko04113;path:ko04114;path:ko04261;path:ko04270;path:ko04390;path:ko04510;path:ko04611;path:ko04720;path:ko04728;path:ko04750;path:ko04810;path:ko04910;path:ko04921;path:ko04931;path:ko05031;path:ko05034;path:ko05168;path:ko05205
ACg003763	K00566	path:ko04122
ACg008334	K00586
ACg003096	K14769
ACg003677	K09529
ACg006610	K06126	path:ko00130;path:ko01100;path:ko01110
ACg008466	K12349	path:ko00600;path:ko01100;path:ko04071
ACg008085	K01379	path:ko04071;path:ko04142;path:ko04210;path:ko05152
ACg003163	K01230	path:ko00510;path:ko00513;path:ko01100;path:ko04141
ACg003546	K03142	path:ko03022;path:ko03420;path:ko05203
ACg007257	K06883
ACg002191	K10990	path:ko03460
ACg003380	K00858	path:ko00760;path:ko01100
ACg002422	K08863	path:ko04068
ACg008150	K01634	path:ko00600;path:ko01100;path:ko04071
ACg005887	K01099	path:ko00562;path:ko01100;path:ko04070
ACg002479	K18158
ACg007412	K12273
ACg006466	K17066	path:ko00680;path:ko01100;path:ko01120;path:ko01200
ACg003903	K15205
ACg008685	K15322
ACg002962	K14654	path:ko00740;path:ko01100
ACg002569	K14780
ACg000968	K00507	path:ko01040;path:ko01212;path:ko03320;path:ko04152;path:ko04212
ACg008555	K11849
ACg001336	K14792
ACg001296	K00281	path:ko00260;path:ko00630;path:ko01100;path:ko01110;path:ko01130;path:ko01200
ACg007965	K12597	path:ko03018
ACg005428	K13628
ACg002842	K08838
ACg009079	K06027	path:ko04721;path:ko04727;path:ko04962
ACg003964	K02210	path:ko03030;path:ko04110;path:ko04111;path:ko04113
ACg001960	K05767	path:ko04810
ACg005363	K06684	path:ko04111；ko04392
ACg005447	K04534	path:ko04015;ko04915;ko04921;ko04916;ko04724;ko04727;ko04725;ko04728;ko04726;ko04730;ko04723;ko04713;ko05032;ko05034;ko05145;ko05142
ACg006783	K00559	path:ko00100
ACg005528	K06674	path:ko04111
ACg004445	K06689	path:ko04013;ko04120; ko04141; ko04624
